# Supplementary material for: Cytotoxic Activity, Topoisomerase I Inhibition and In Silico Studies of New Sesquiterpene-aryl Ester Derivatives of (-) Drimenol
Source: MDPI journal article supplement (doi:10.3390/molecules28093959), 2023-05-08
Supplement: s1 [file s1]

# Cytotoxic Activity, Topoisomerase I Inhibition and In Silico Studies of New Sesquiterpene-aryl Ester Derivatives of (-) Drimenol

Ileana Araque <sup>1</sup>, Javiera Ramírez <sup>1</sup>, Rut Vergara <sup>2</sup>, Jaime Mella <sup>3,4</sup>, Pablo Aránguiz <sup>5</sup>, Luis Espinoza <sup>6</sup>, Waleska Vera <sup>1,4</sup>, Iván Montenegro <sup>4,7</sup>, Cristian O. Salas <sup>8</sup>, Joan Villena <sup>2</sup> and Mauricio A. Cuellar <sup>1,4,\*</sup>

<sup>1</sup> Facultad de Farmacia, Escuela de Química y Farmacia, Universidad de Valparaíso, Av. Gran Bretaña 1093, Valparaíso 2340000, Chile

<sup>2</sup> Centro de Investigaciones Biomédicas, Escuela de Medicina, Facultad de Medicina, Universidad de Valparaíso, Viña del Mar 2520000, Chile

<sup>3</sup> Instituto de Química y Bioquímica, Facultad de Ciencias, Universidad de Valparaíso, Valparaíso 2340000, Chile

<sup>4</sup> Centro de Investigación Farmacopea Chilena (CIFAR), Universidad de Valparaíso, Valparaíso 2340000, Chile

<sup>5</sup> Escuela de Química y Farmacia, Facultad de Medicina, Universidad Andrés Bello, Viña del Mar 2520000, Chile

<sup>6</sup> Departamento de Química, Universidad Técnica Federico Santa María, Avenida España 1680, Valparaíso 2340000, Chile

<sup>7</sup> Facultad de Medicina, Escuela de Obstetricia y Puericultura, Universidad de Valparaíso, Angamos 655, Reñaca, Viña del Mar 2520000, Chile

<sup>8</sup> Departamento de Química Orgánica, Facultad de Química y de Farmacia, Pontificia Universidad Católica de Chile, Avenida Vicuña Mackenna 4860, Macul, Santiago de Chile 7820436, Chile

\* Correspondence: mauricio.cuellar@uv.cl; Tel.: +56-32-2508439

## Index

|                                                                                              |            |
|----------------------------------------------------------------------------------------------|------------|
| <sup>1</sup> H, <sup>13</sup> C NMR and <sup>13</sup> C-DEPT 135 of selected compounds ..... | page 02–17 |
| HRMS of selected compounds.....                                                              | page 18–23 |
| Molecular Docking and Molecular Dynamics results.....                                        | page 24–26 |

<sup>1</sup>H NMR for drimenal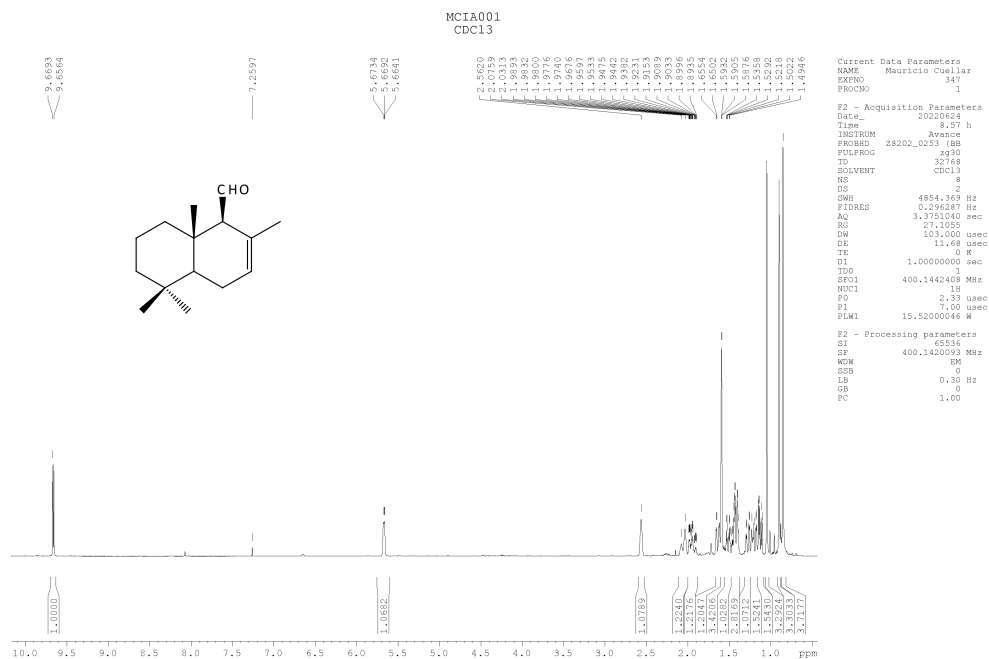

<sup>13</sup>C NMR for drimenal

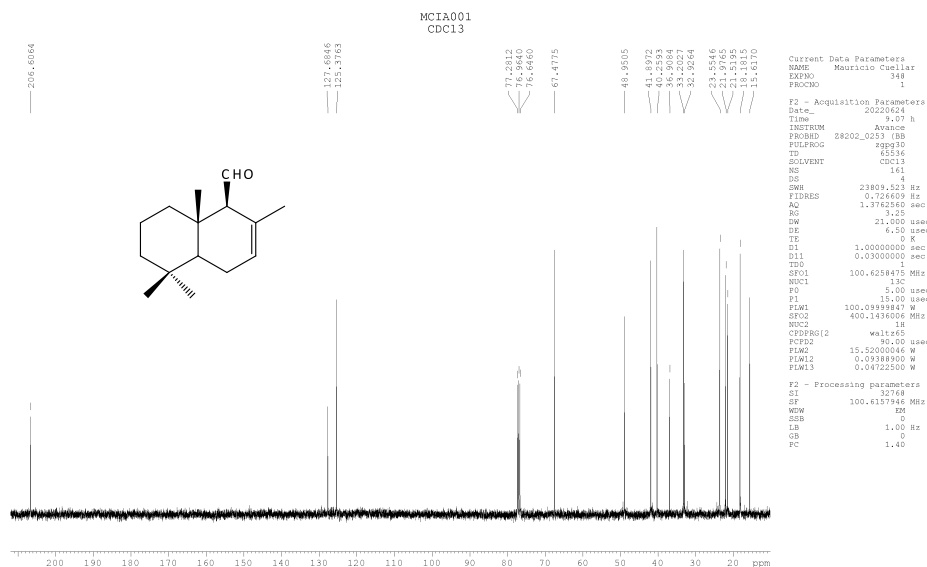 $^{13}\text{C}$ -DEPT 135 NMR for drimenal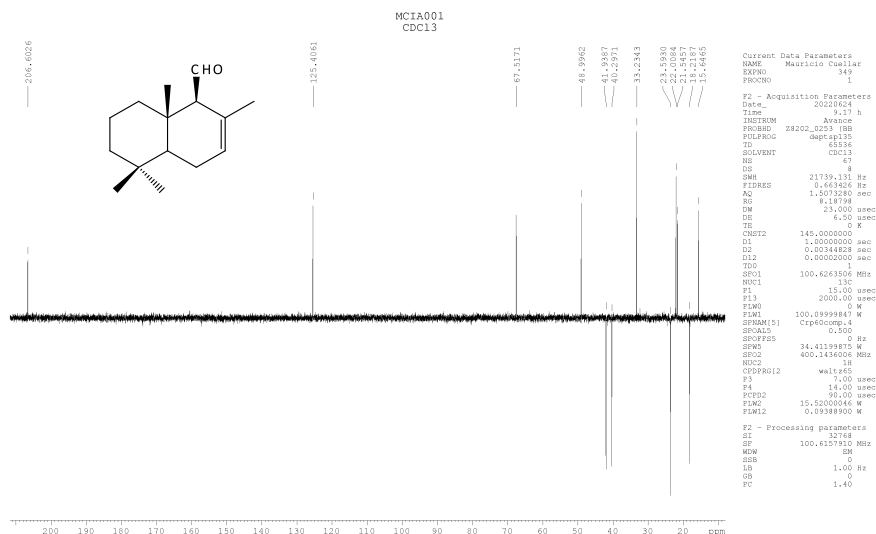

<sup>1</sup>H NMR for drimenic acid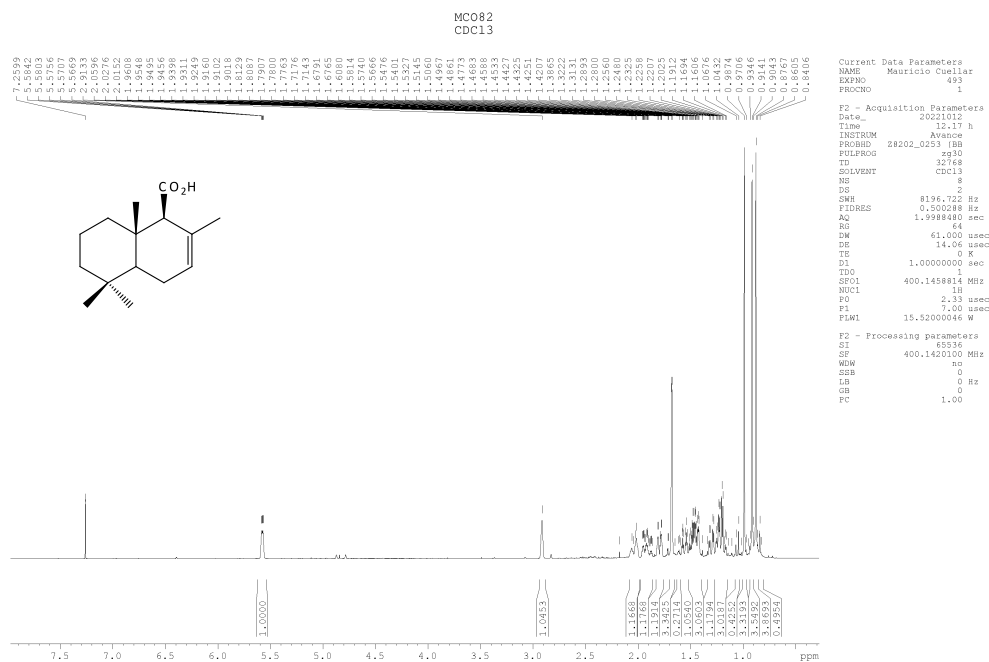 $^{13}\text{C}$  NMR for drimenic acid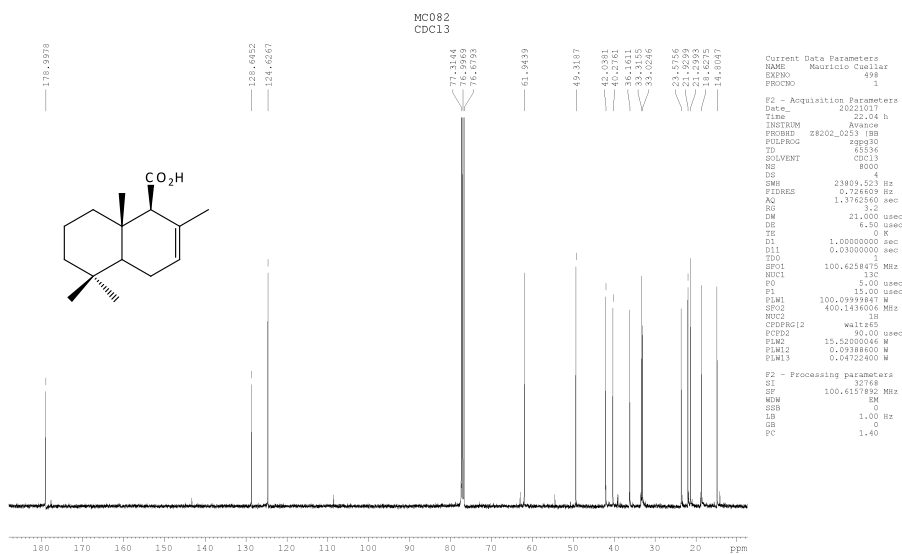 $^{13}\text{C}$ -DEPT 135 NMR for drimenic acid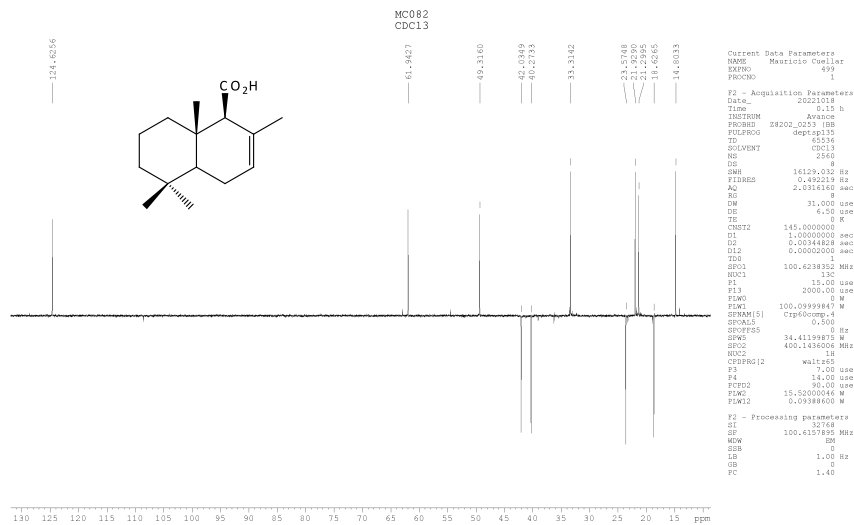

<sup>1</sup>H NMR for 6a

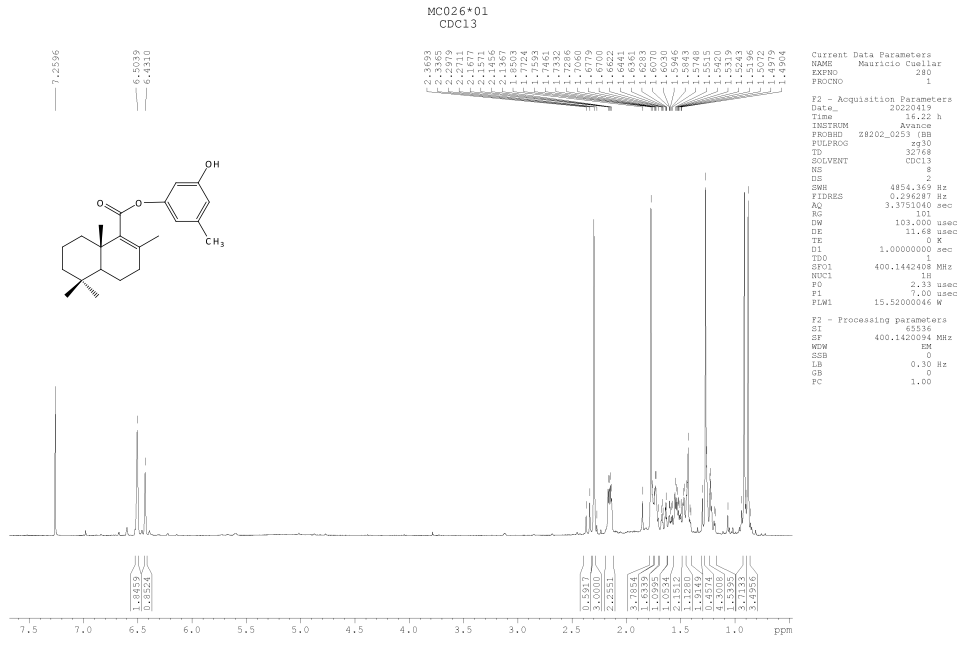

<sup>13</sup>C NMR for 6a

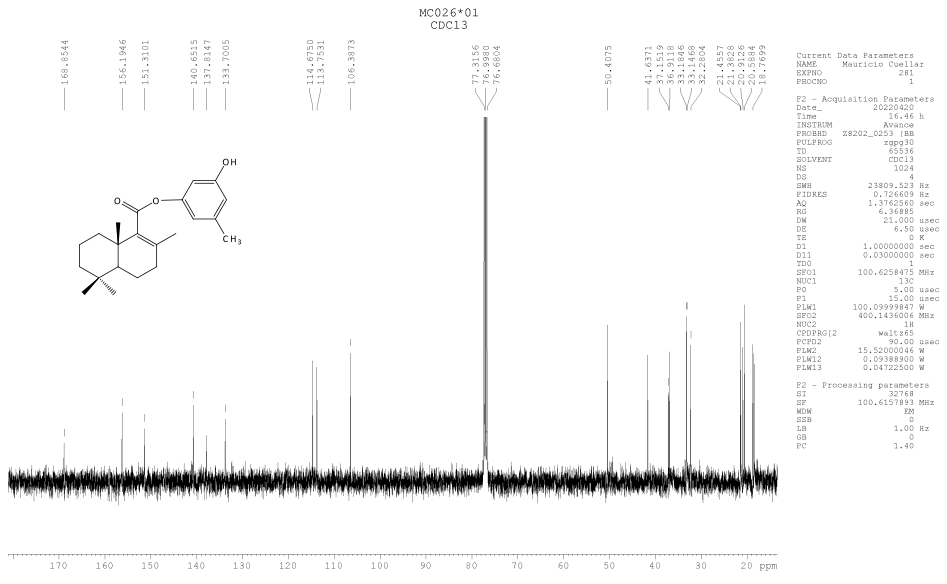

<sup>13</sup>C-DEPT 135 NMR for 6a

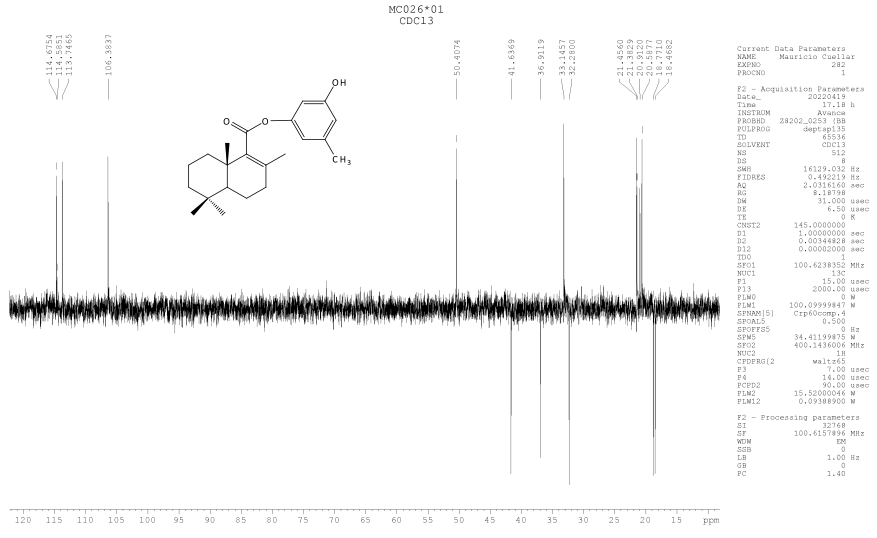



<sup>1</sup>H NMR for 6b

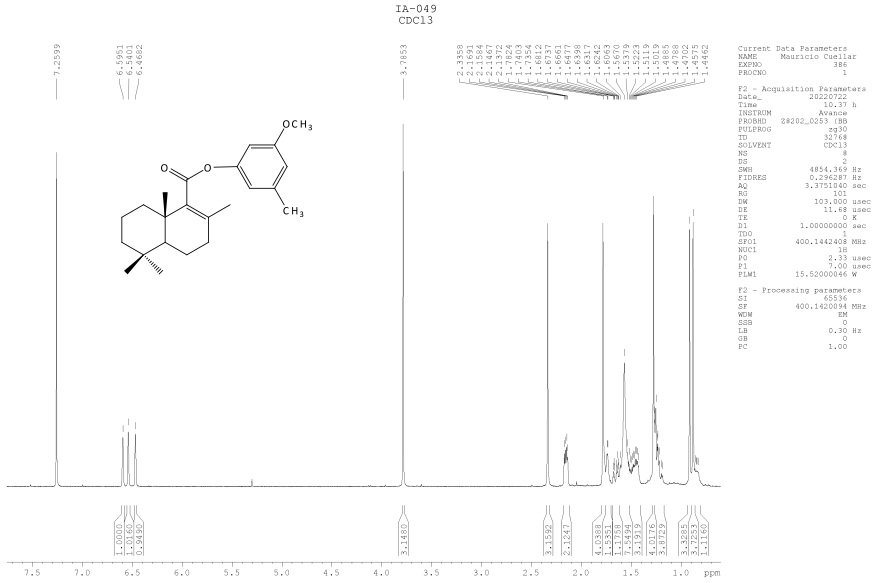

<sup>13</sup>C NMR for 6b

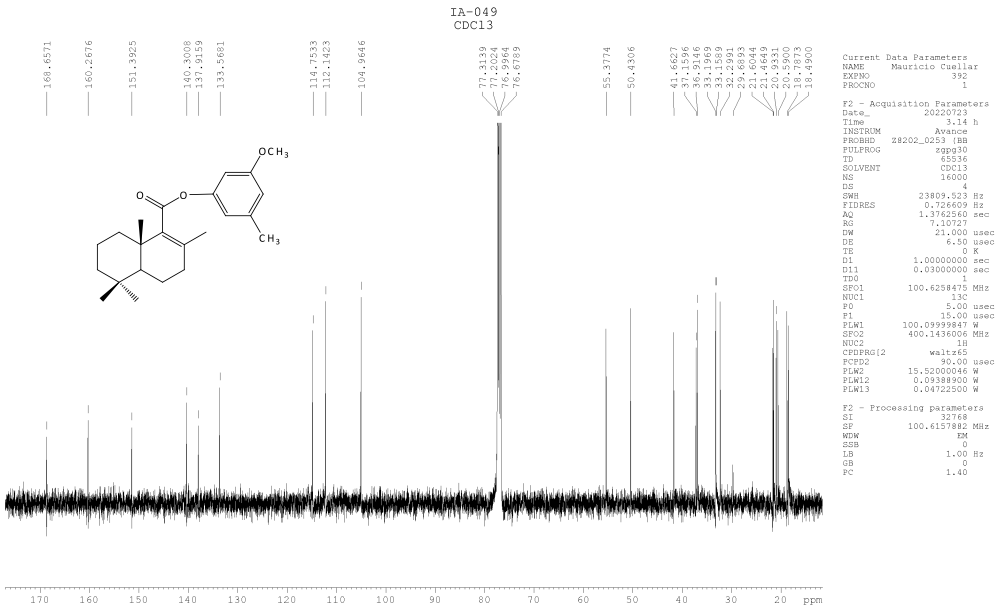

<sup>13</sup>C-DEPT 135 NMR for 6b

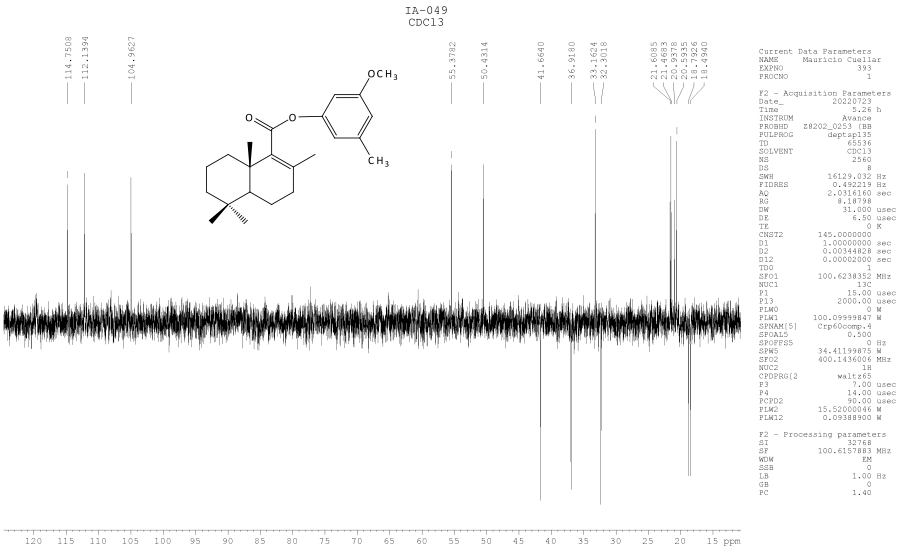

<sup>1</sup>H NMR for 6c

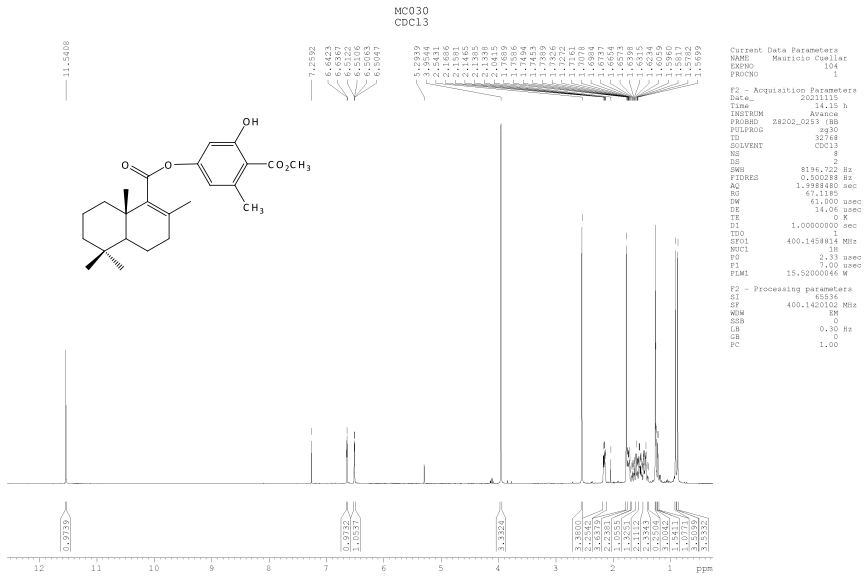

<sup>13</sup>C NMR for 6c

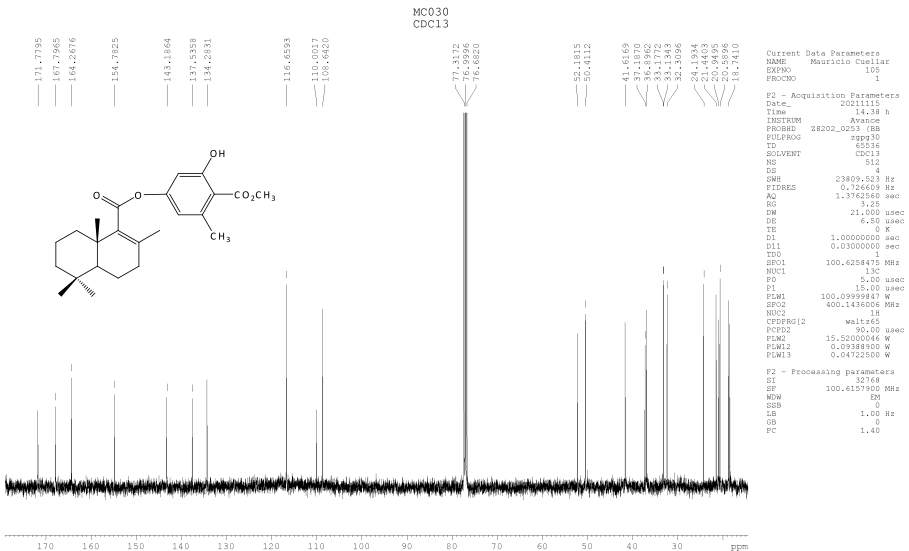

<sup>13</sup>C-DEPT 135 NMR for 6c

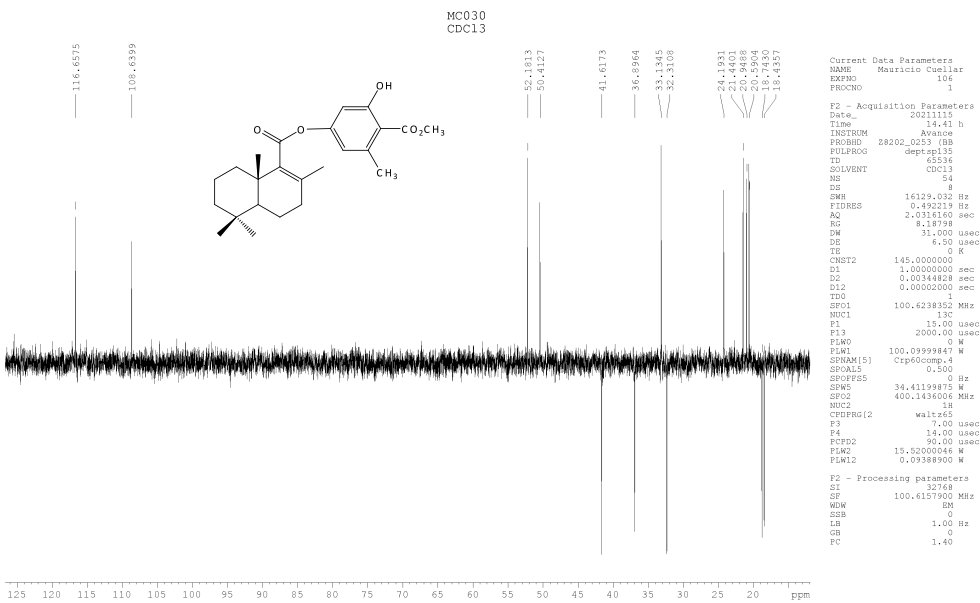

<sup>1</sup>H NMR for 6d

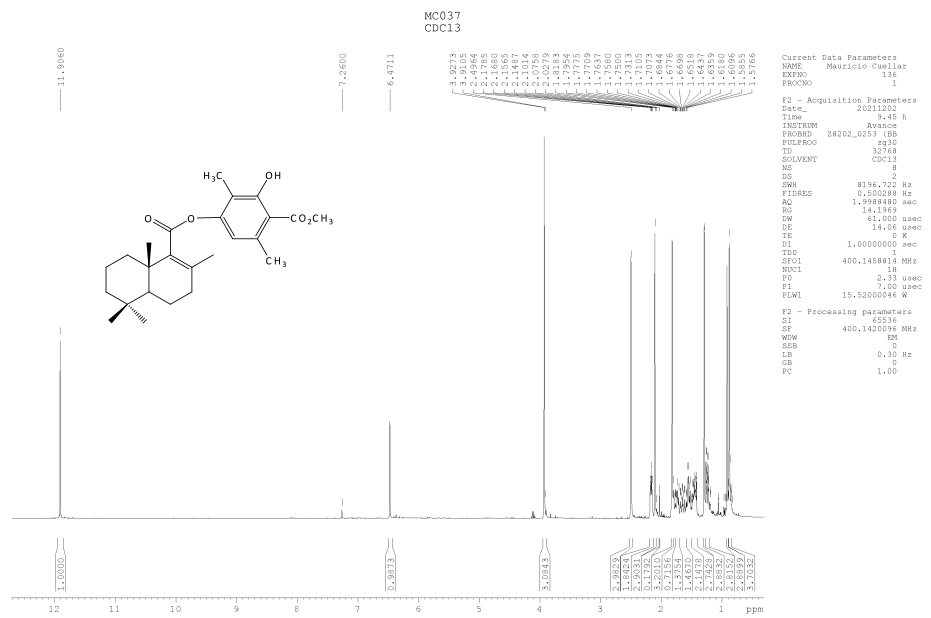

<sup>13</sup>C NMR for 6d

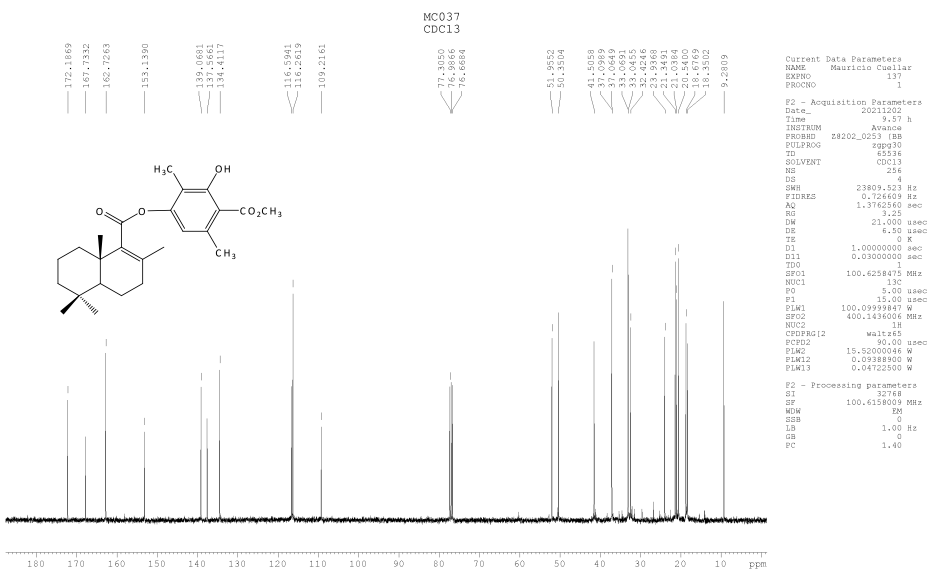

<sup>13</sup>C-DEPT 135 NMR for 6d

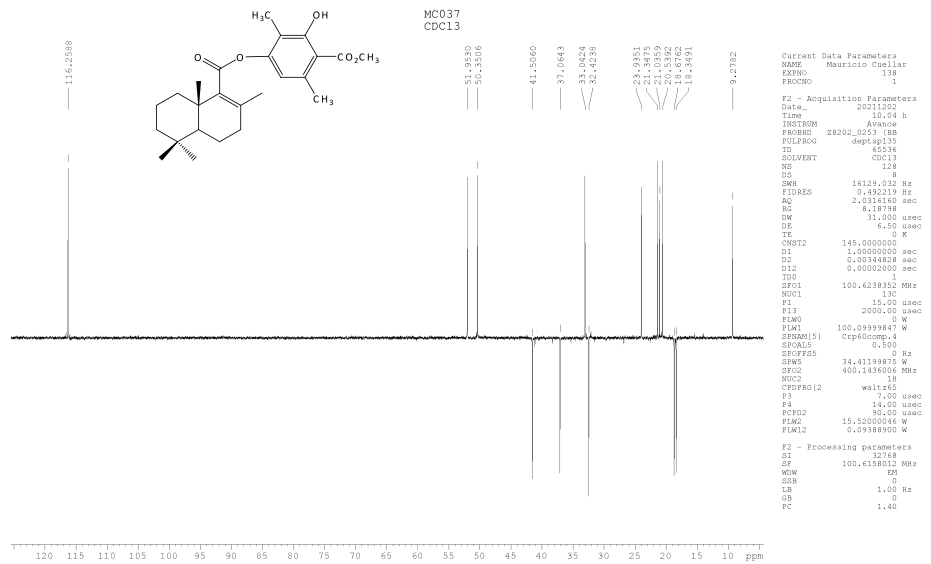

<sup>1</sup>H NMR for 6e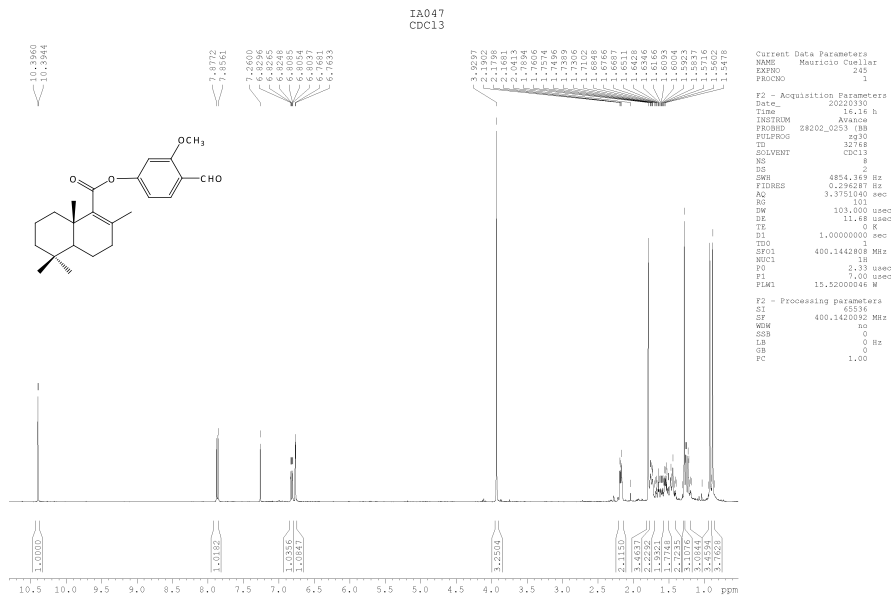 $^{13}\text{C}$  NMR for 6e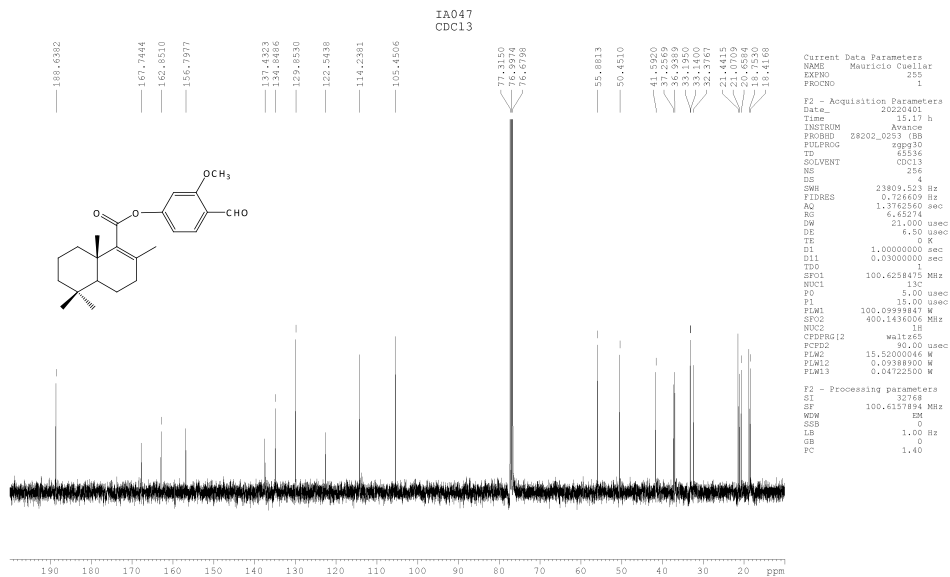 $^{13}\text{C}$ -DEPT 135 NMR for 6e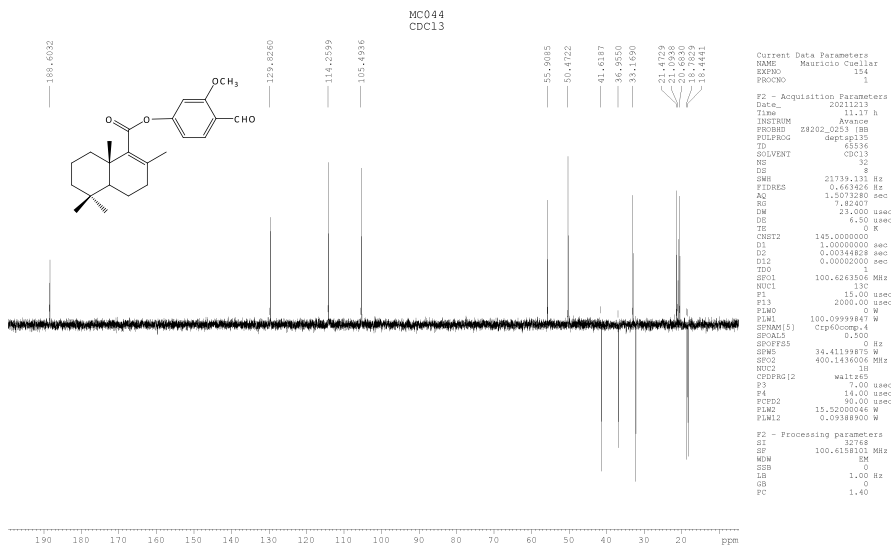

<sup>1</sup>H NMR for 6f

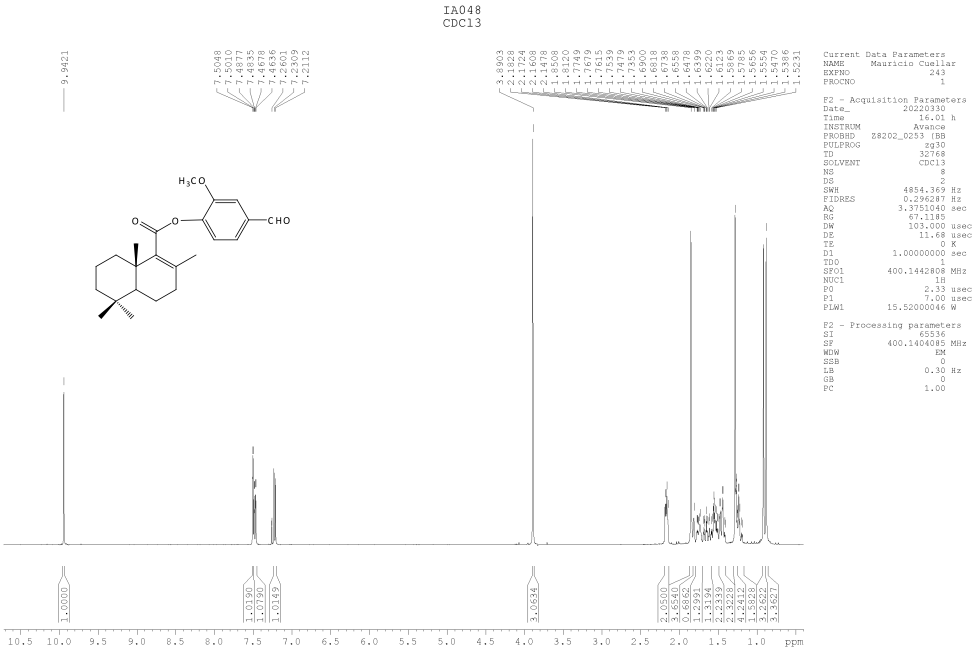

<sup>13</sup>C NMR for 6f

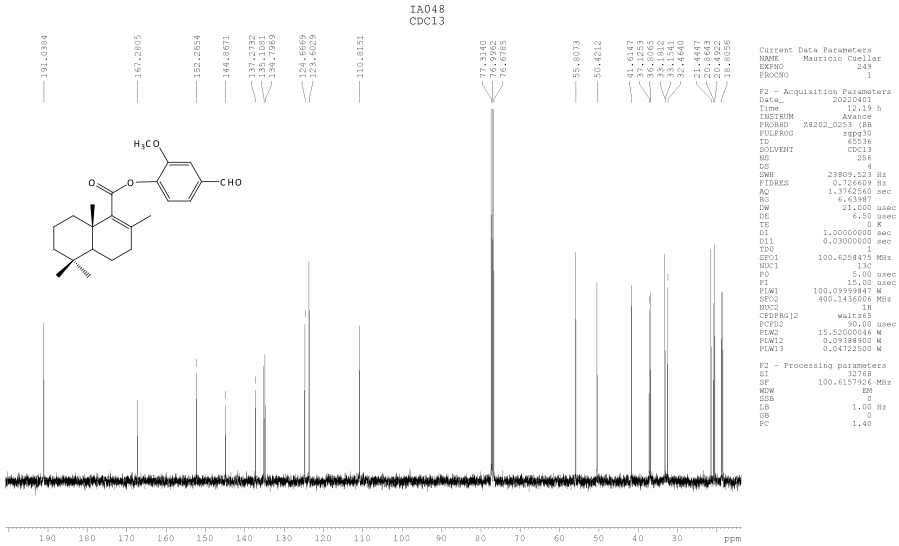

<sup>13</sup>C-DEPT 135 NMR for 6f

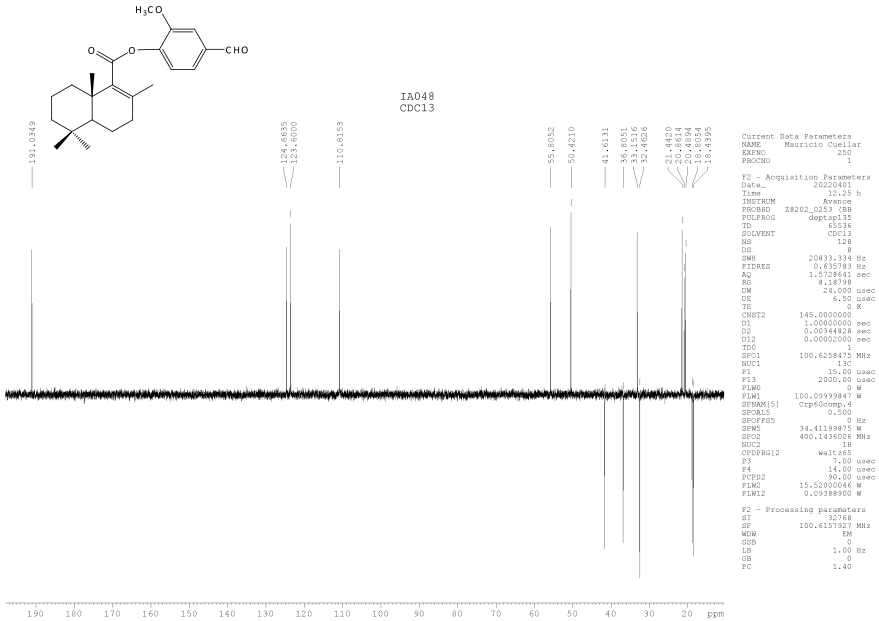

<sup>1</sup>H NMR for 8a

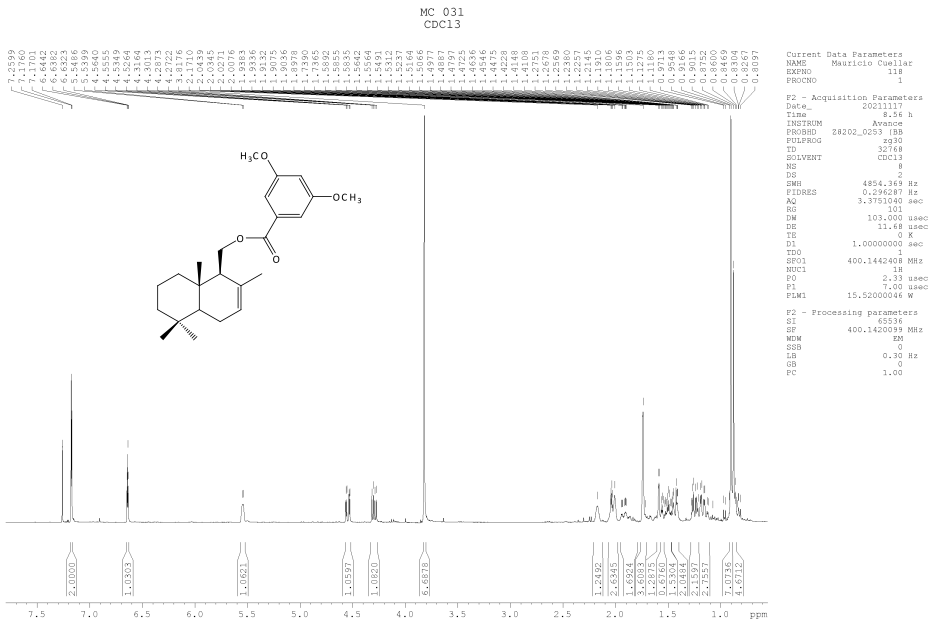

<sup>13</sup>C NMR for 8a

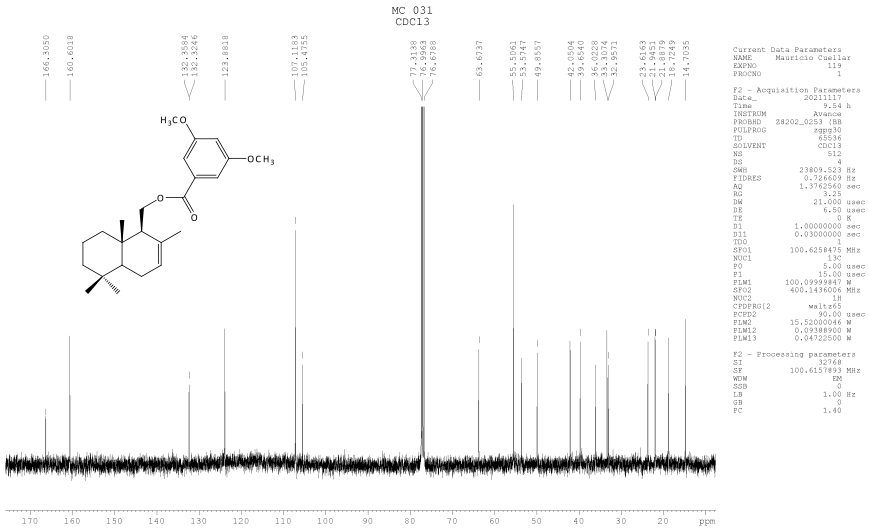

<sup>13</sup>C-DEPT 135 NMR for 8a

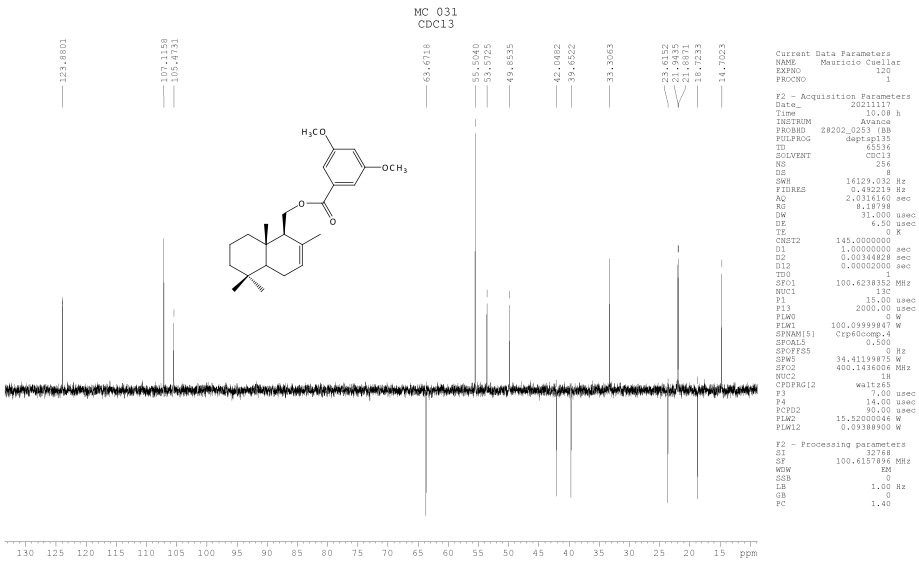

<sup>1</sup>H NMR for 8b

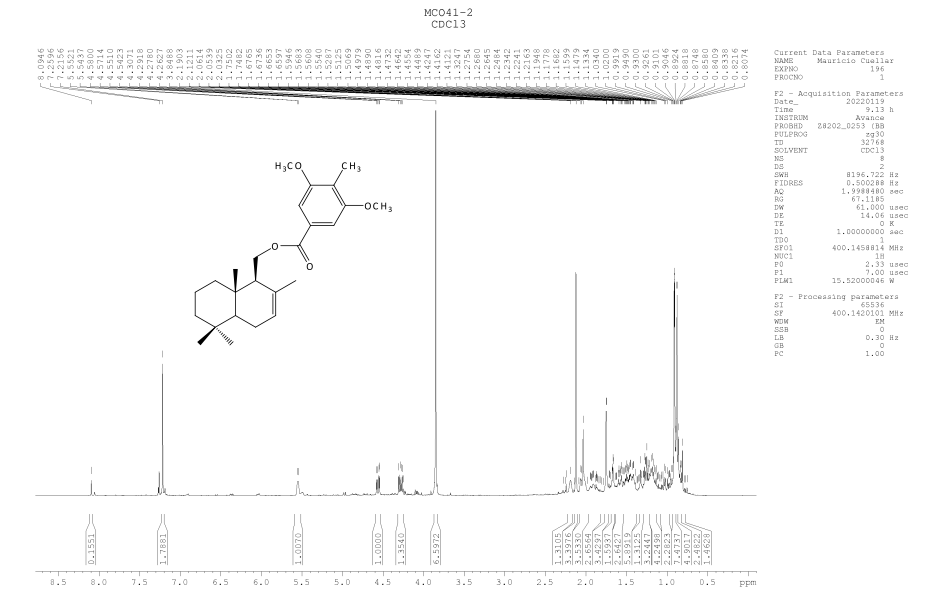

<sup>13</sup>C NMR for 8b

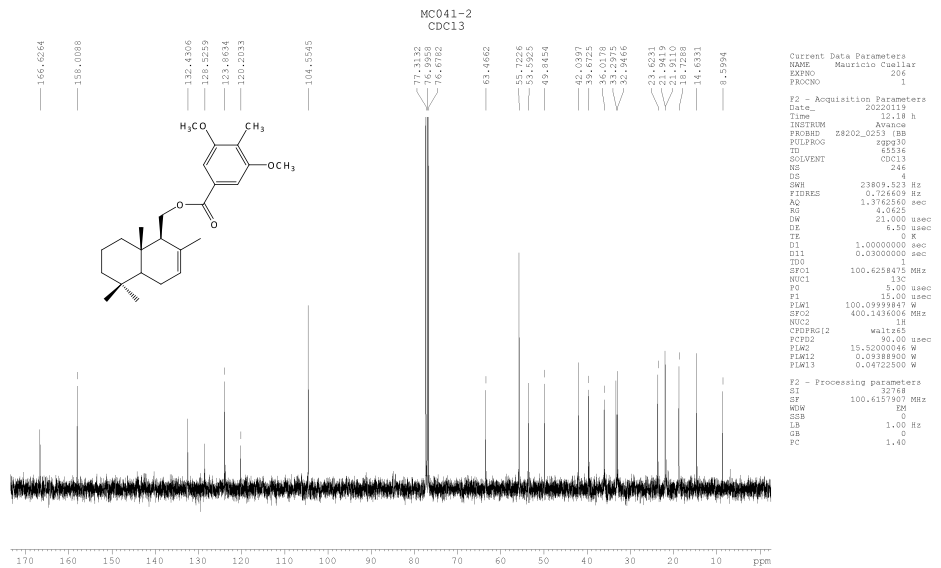

<sup>13</sup>C-DEPT 135 NMR for 8b

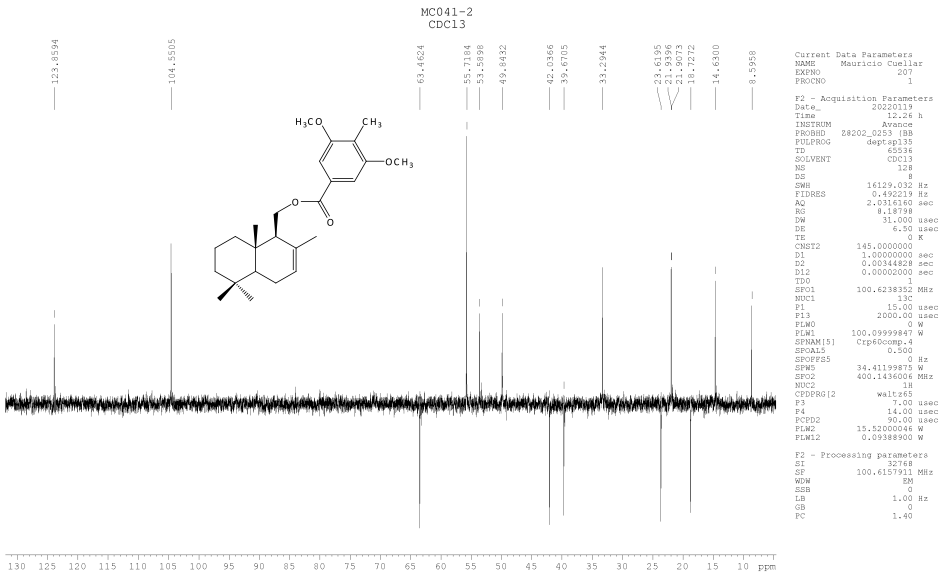

<sup>1</sup>H NMR for 8c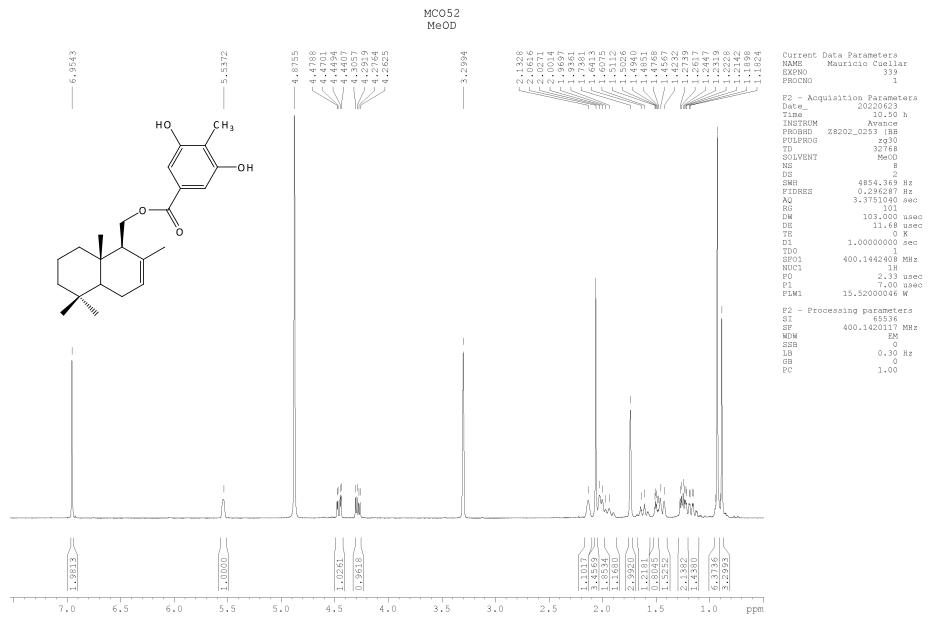 $^{13}\text{C}$  NMR for 8c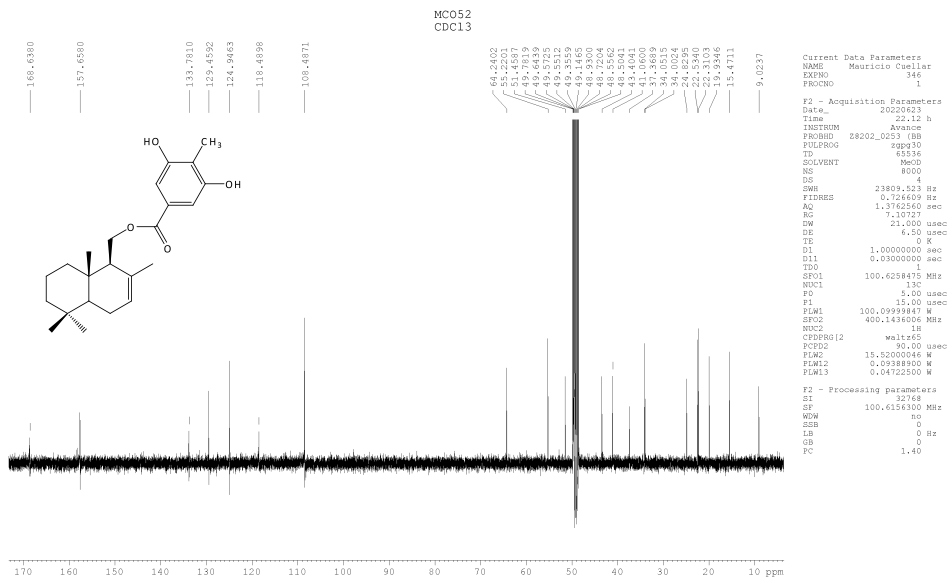 $^{13}\text{C}$ -DEPT 135 NMR for 8c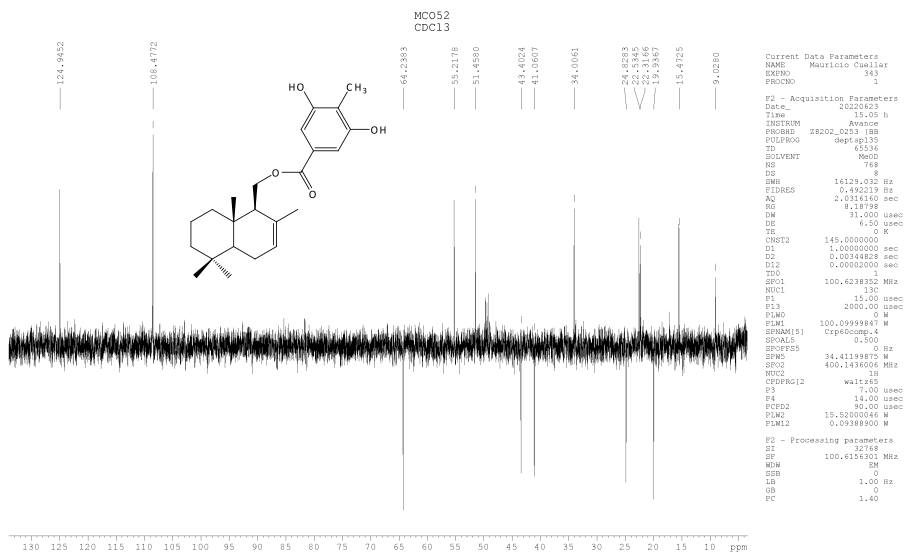



<sup>1</sup>H NMR for 8d

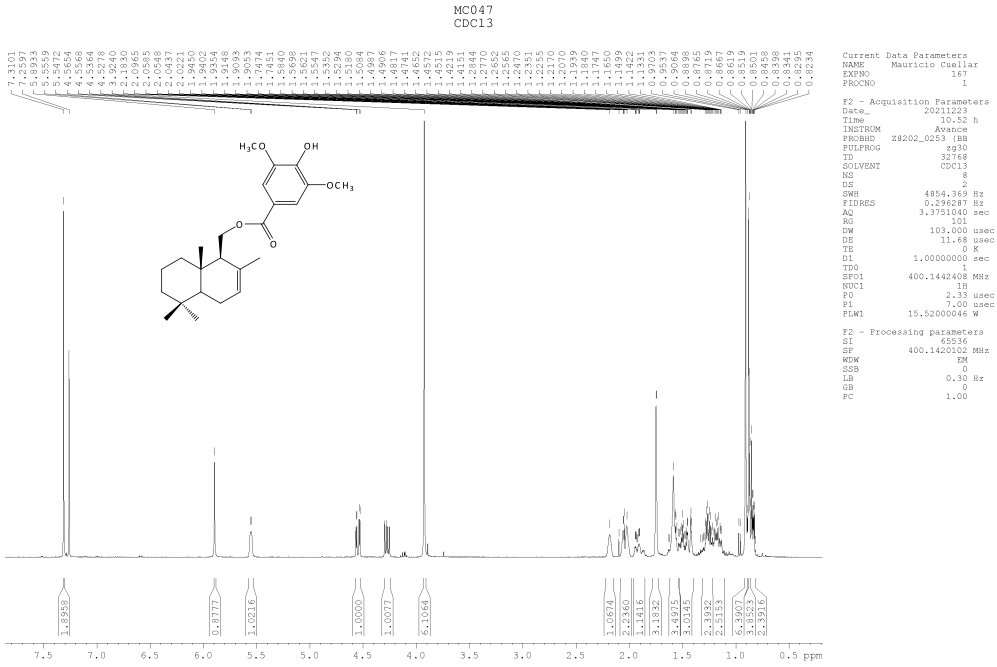

<sup>13</sup>C NMR for 8d

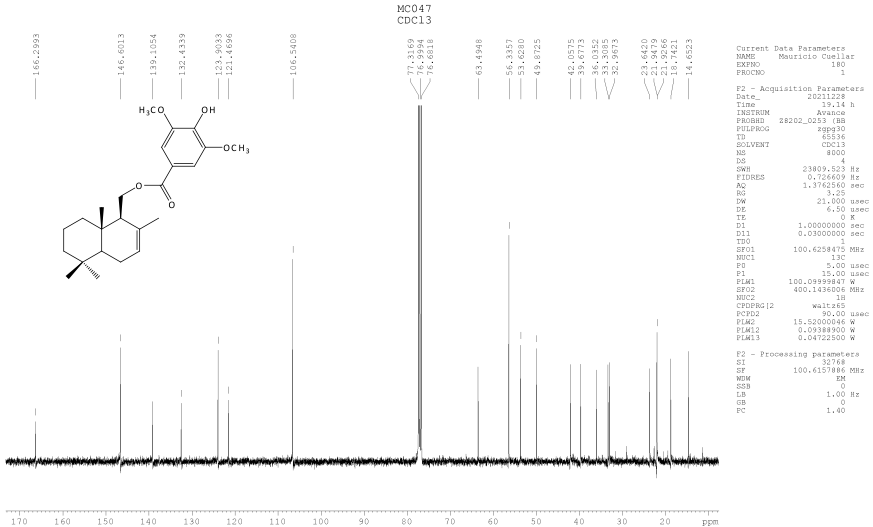

<sup>13</sup>C-DEPT 135 NMR for 8d

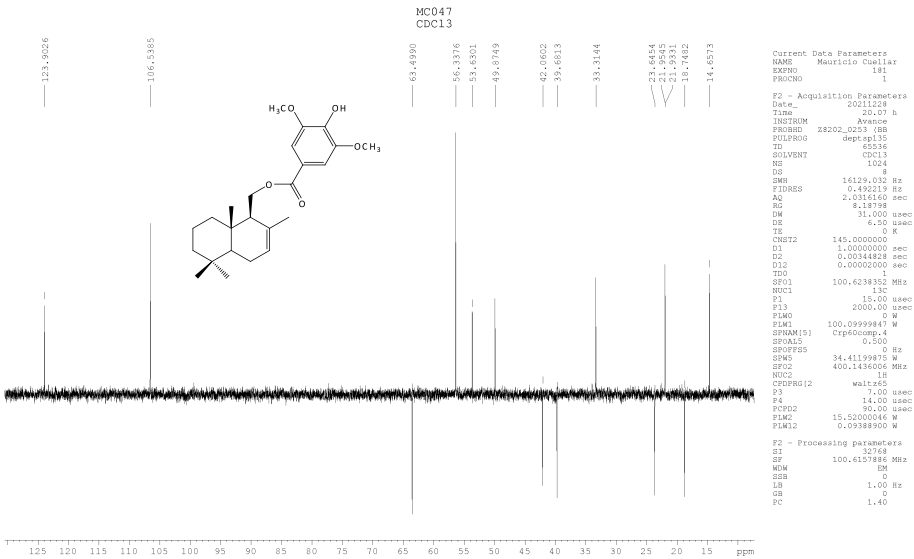

<sup>1</sup>H NMR for 8e

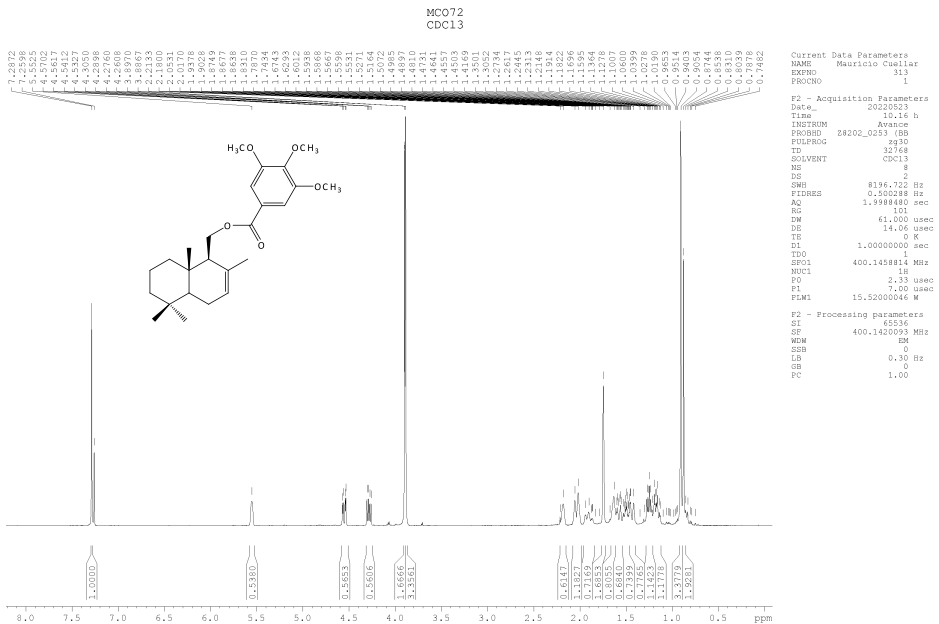

<sup>13</sup>C NMR for 8e

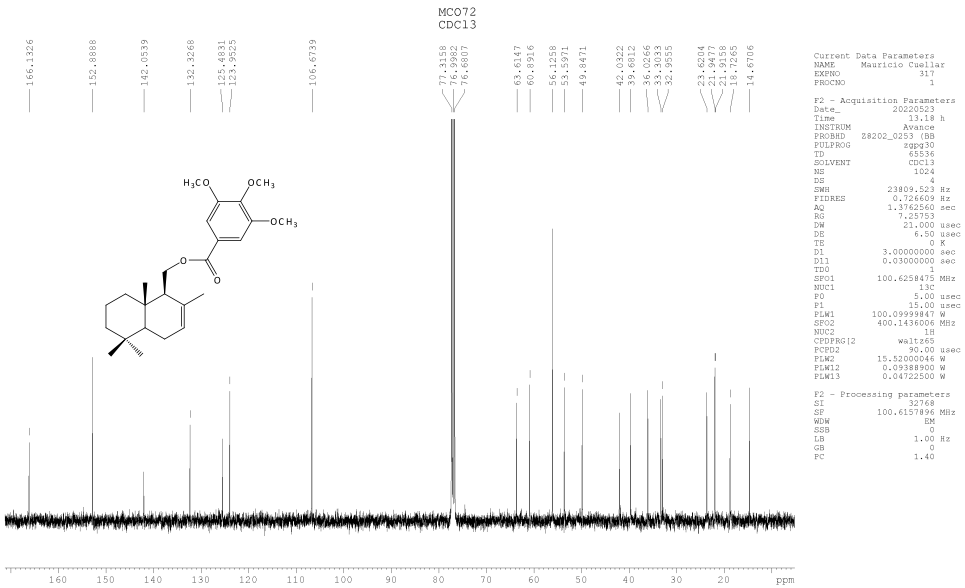

<sup>13</sup>C-DEPT 135 NMR for 8e

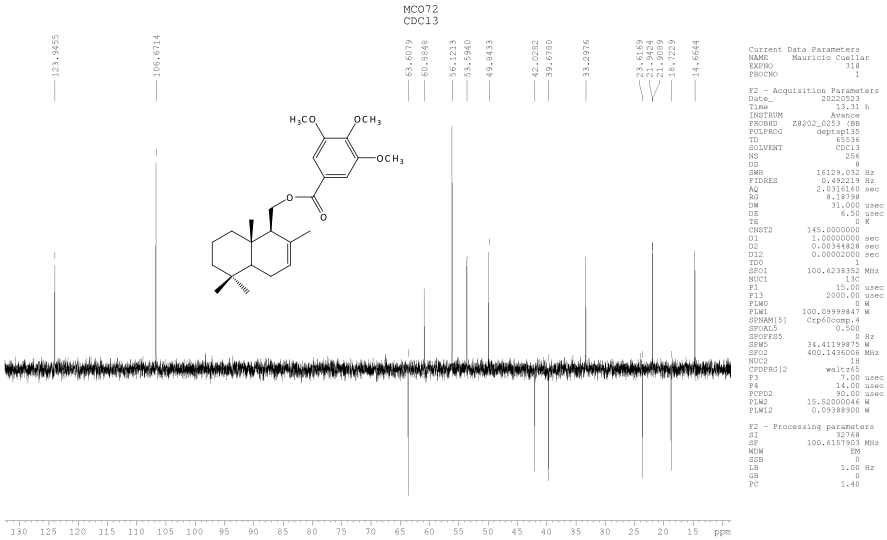

<sup>1</sup>H NMR for 8f

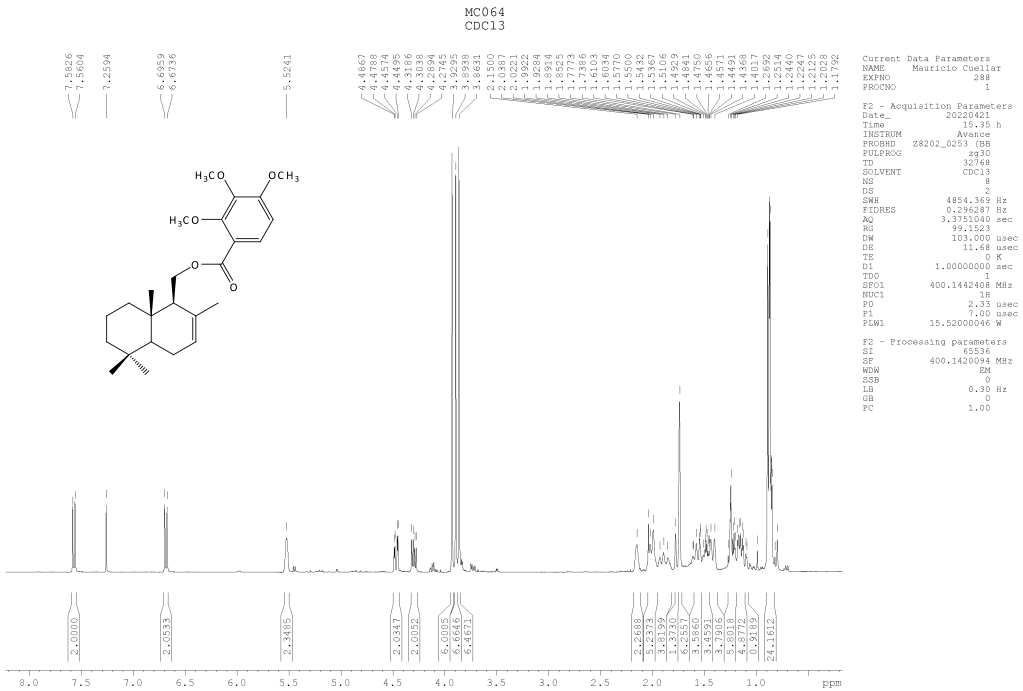

<sup>13</sup>C NMR for 8f

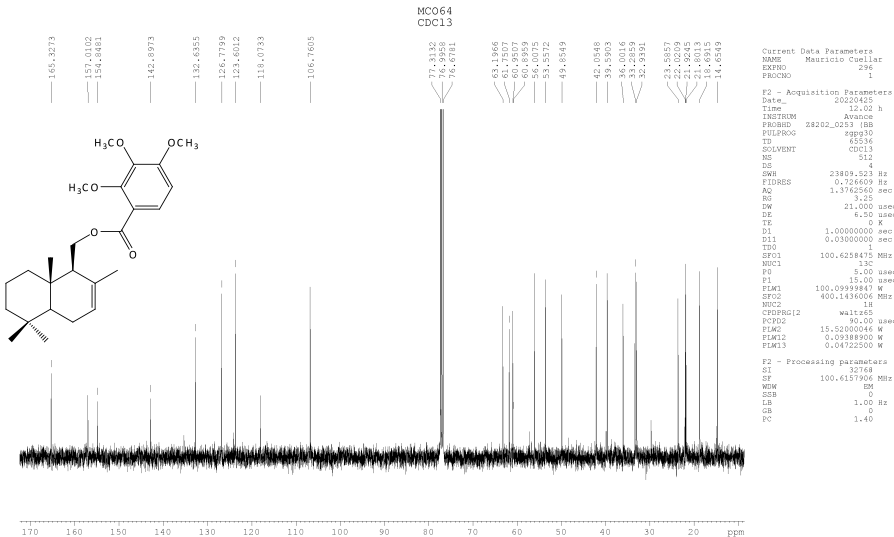

<sup>13</sup>C-DEPT 135 NMR for 8f

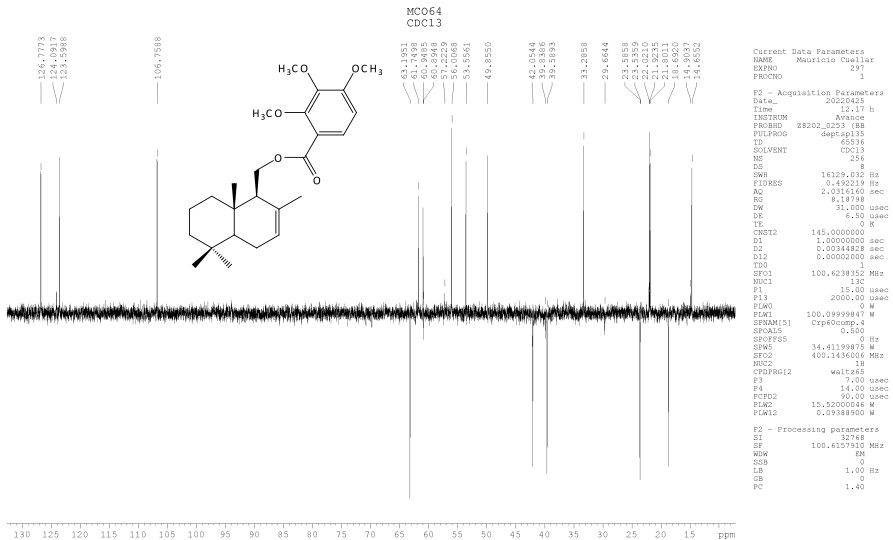

<sup>1</sup>H NMR for 8g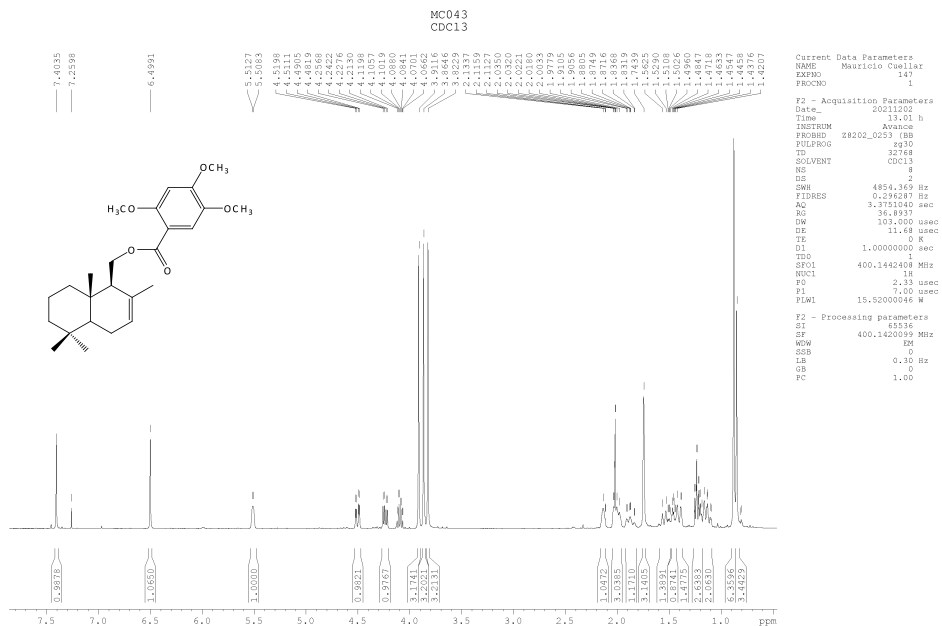 $^{13}\text{C}$  NMR for 8g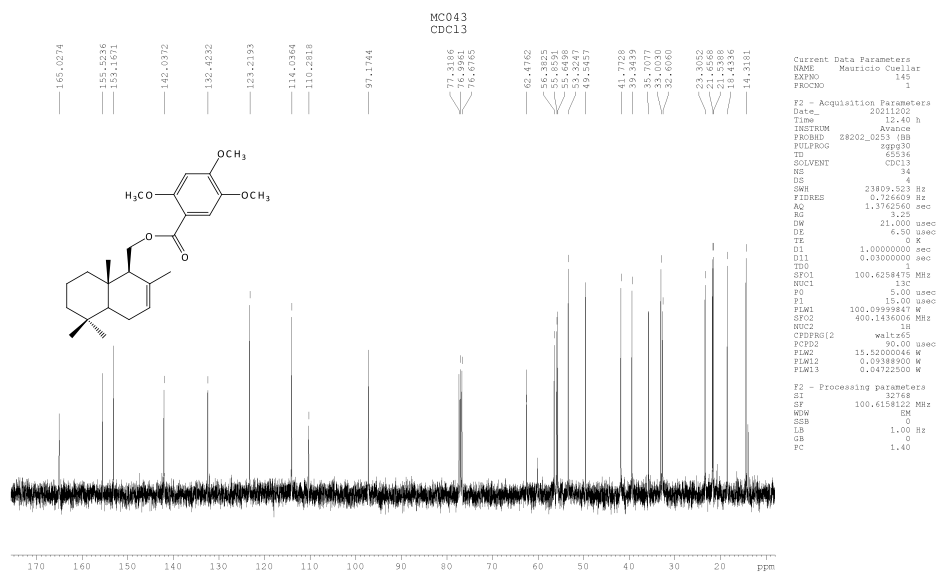 $^{13}\text{C}$ -DEPT 135 NMR for 8g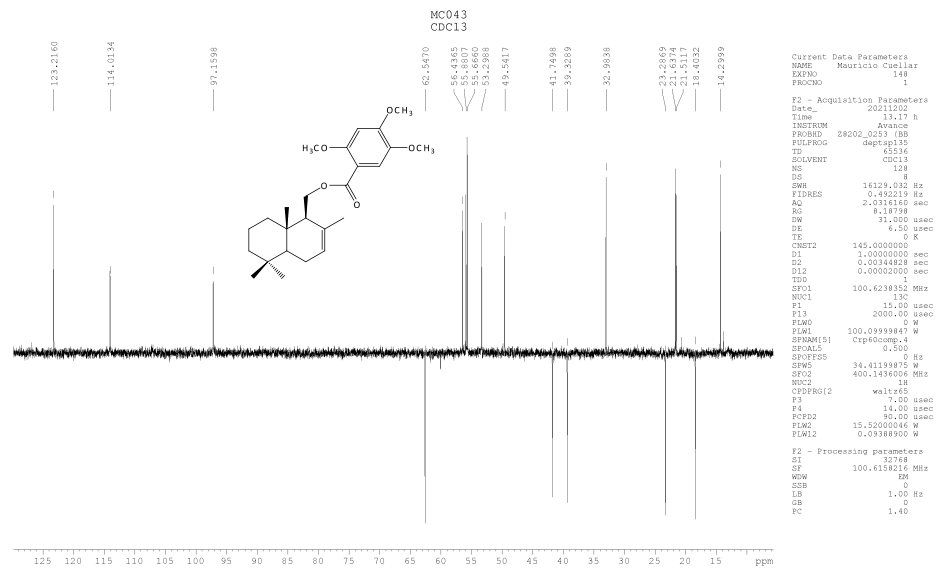

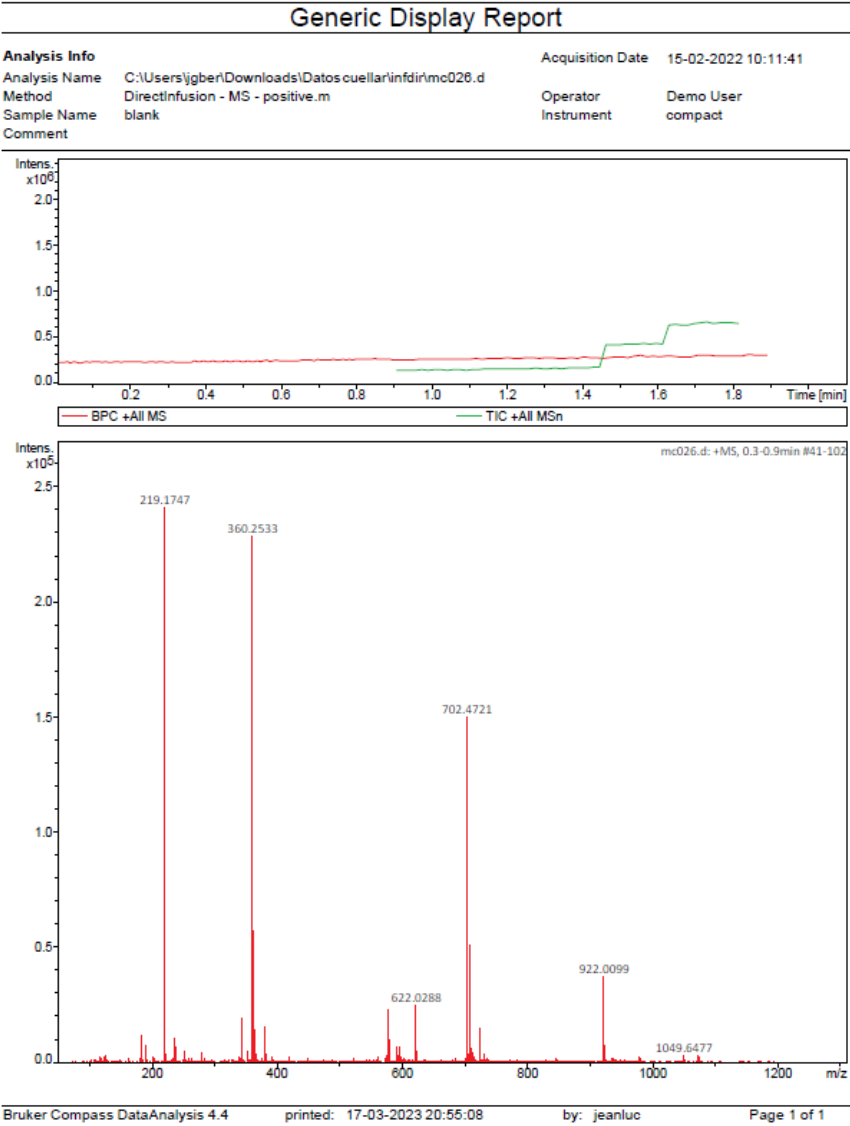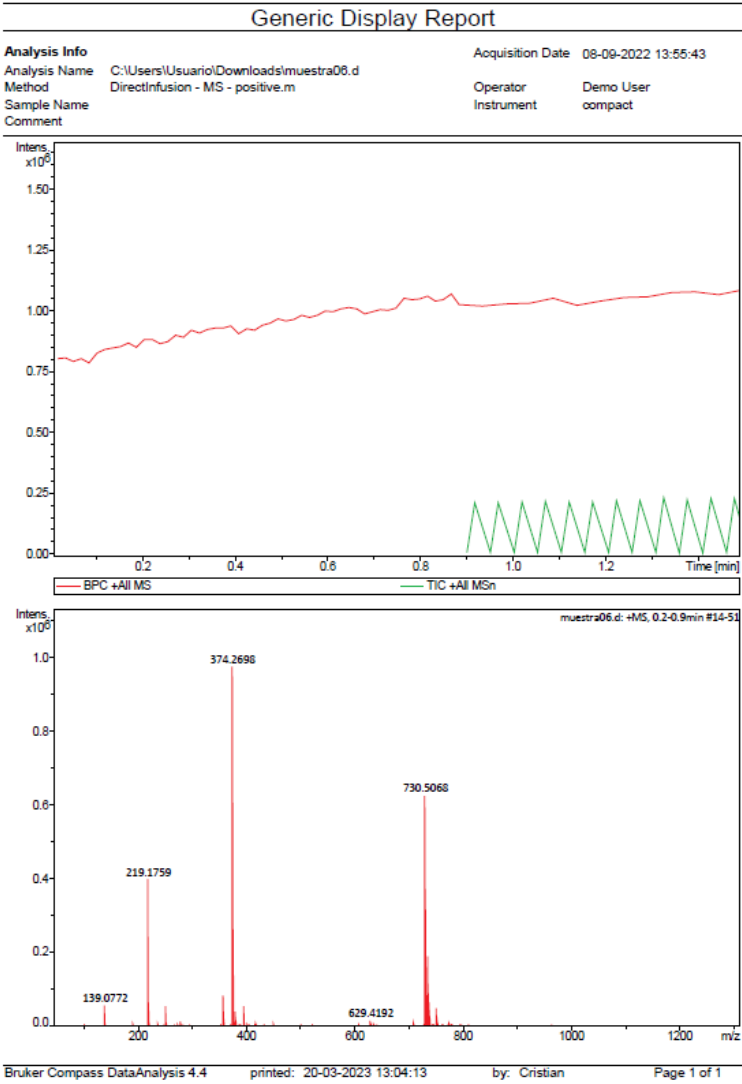

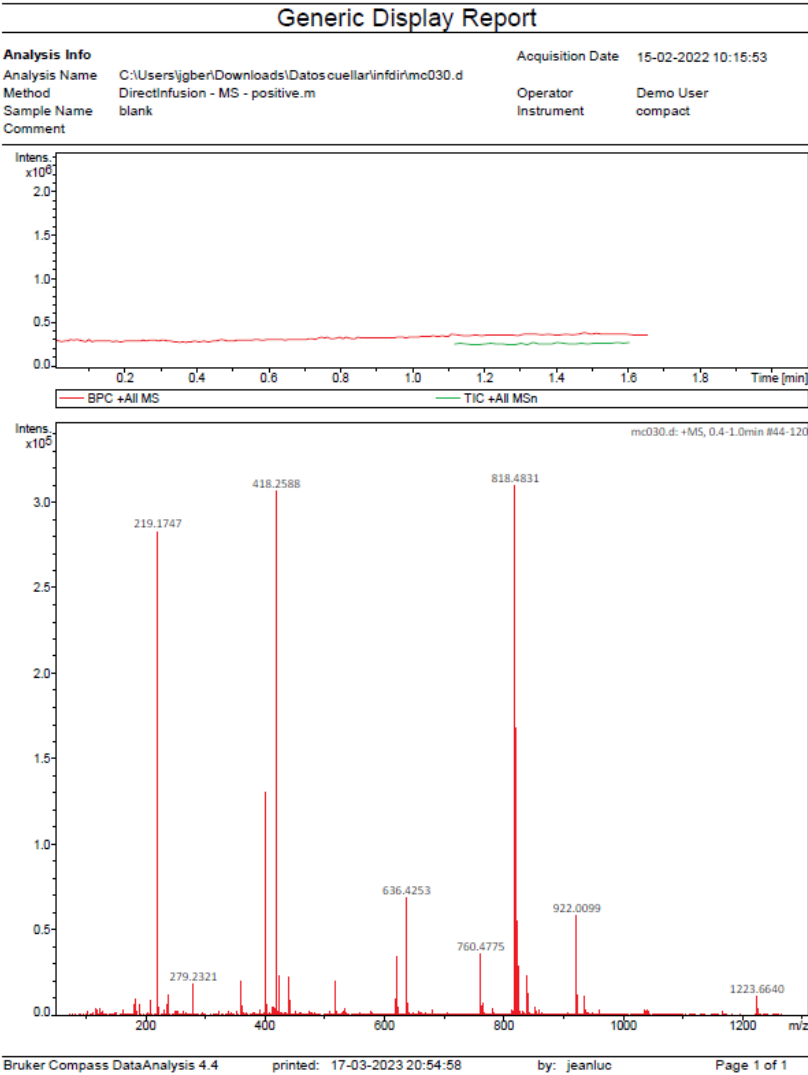

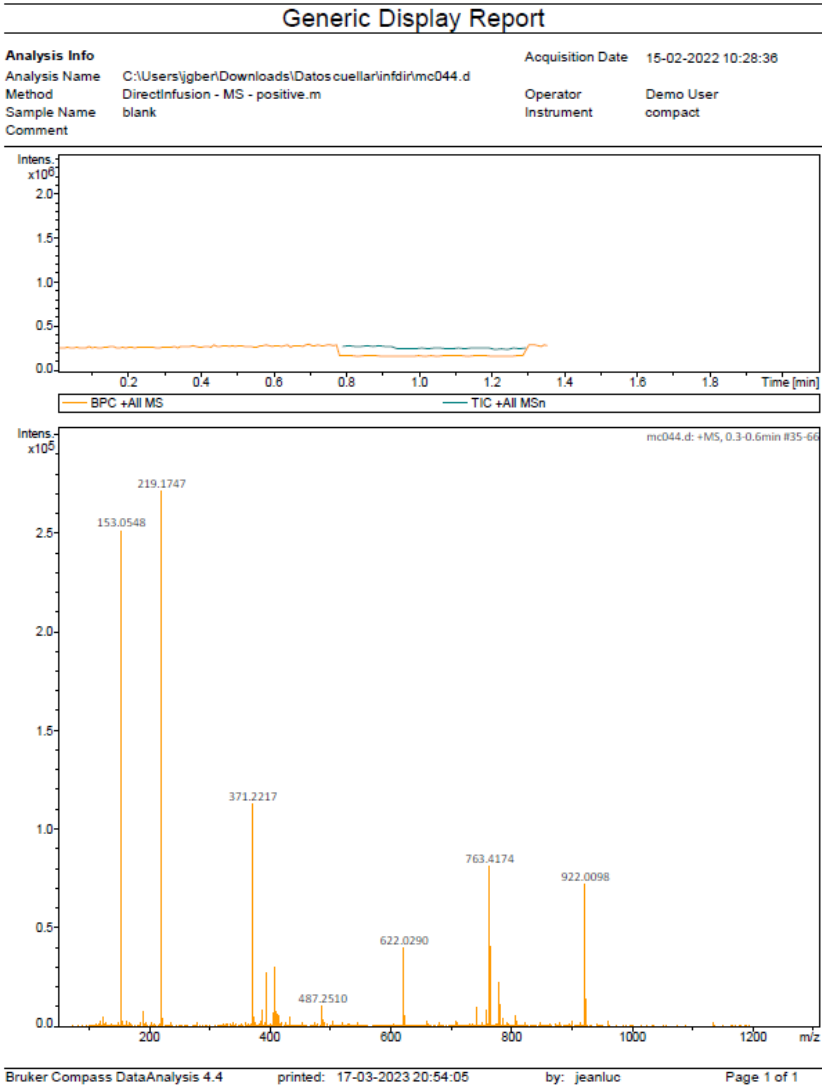

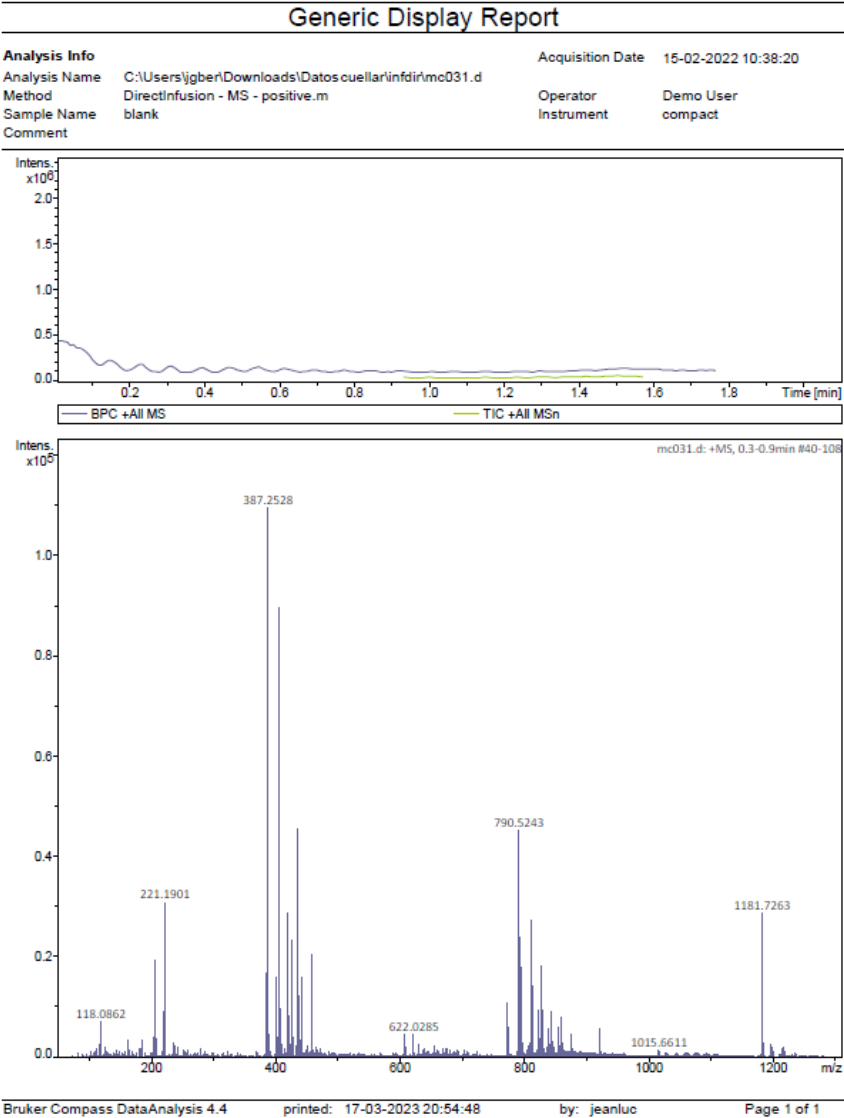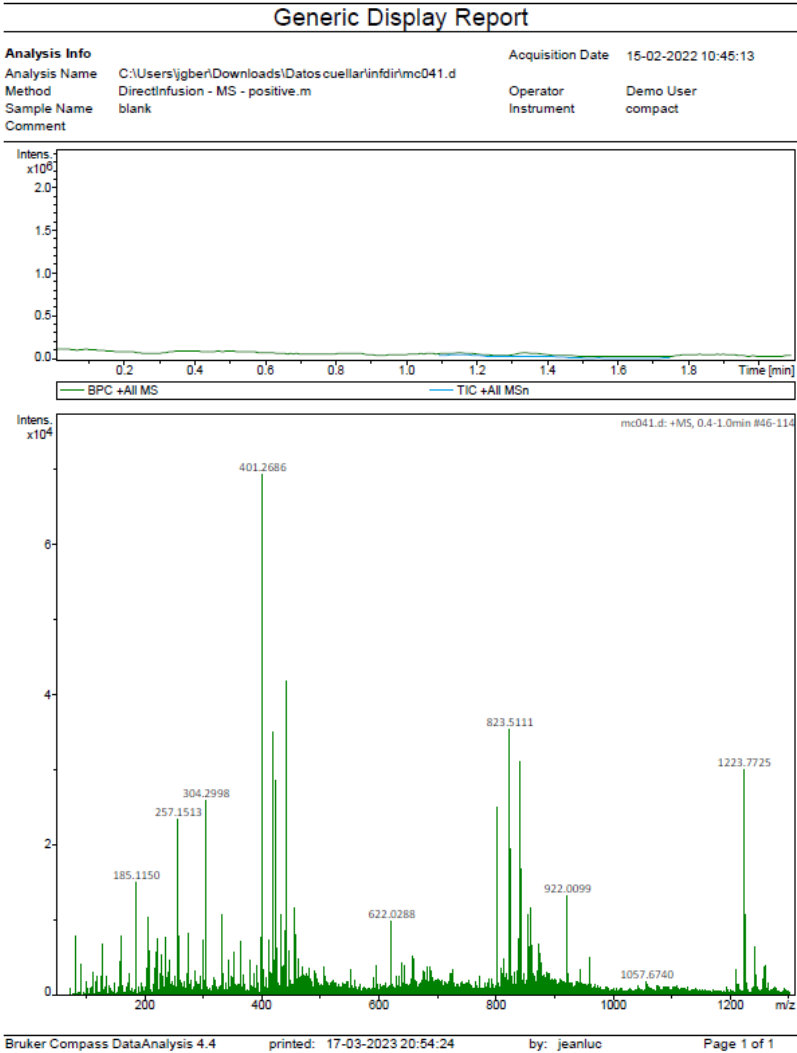



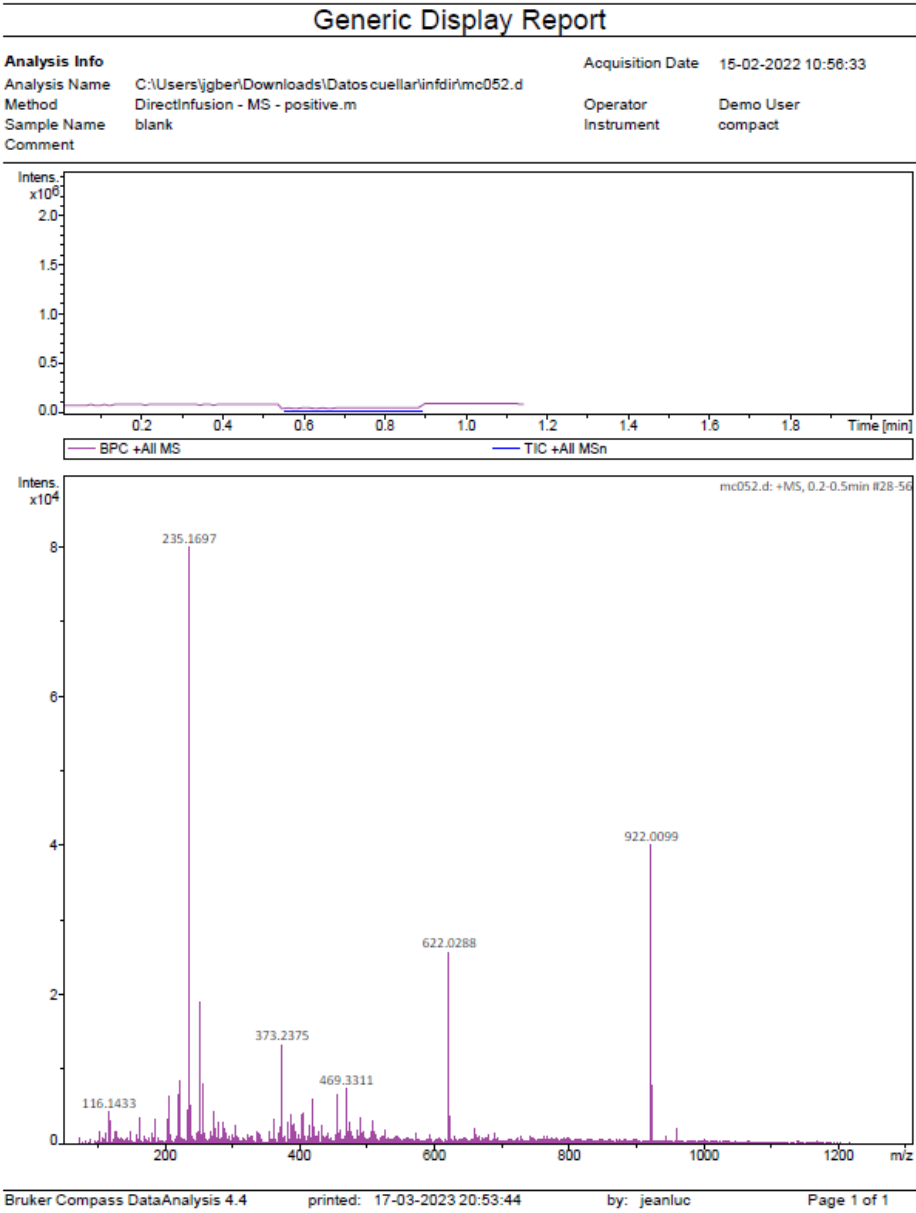

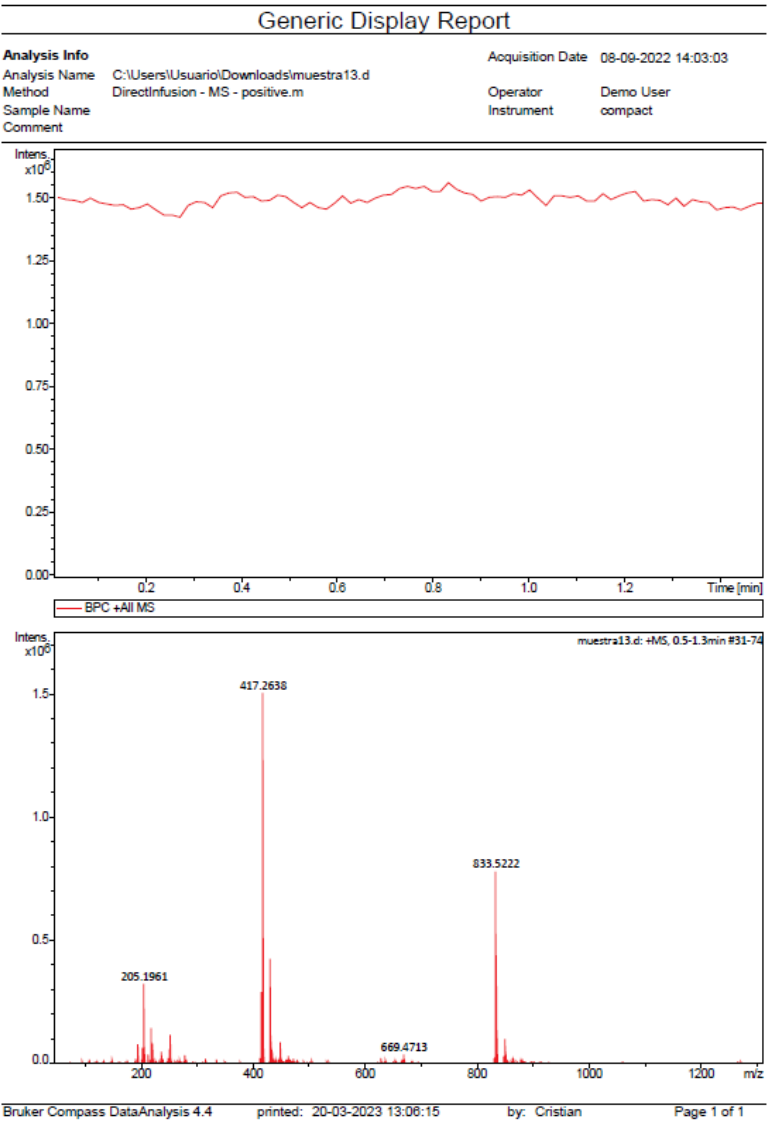

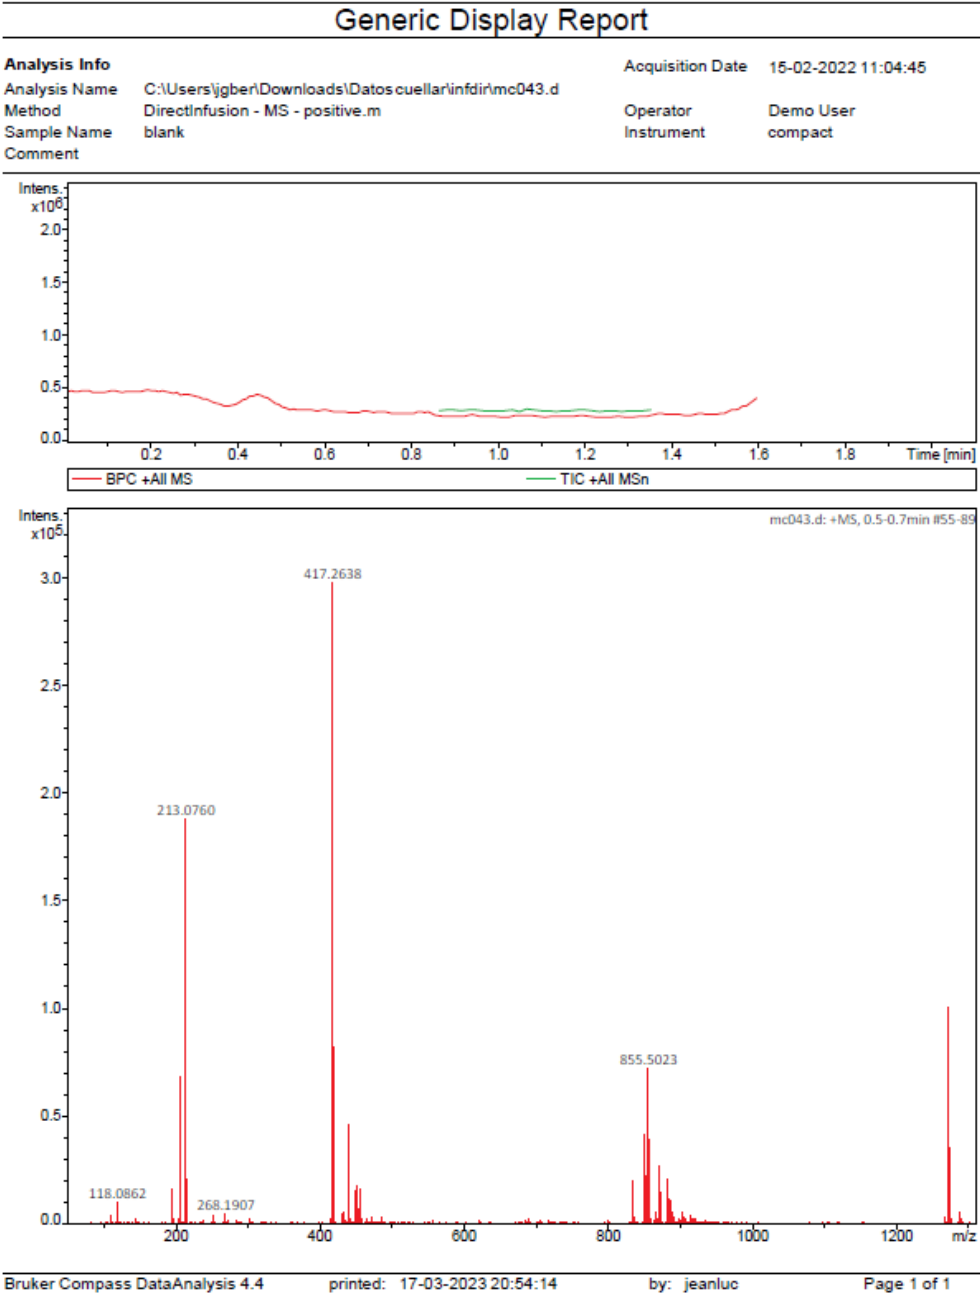

# Protein-Ligand Contacts

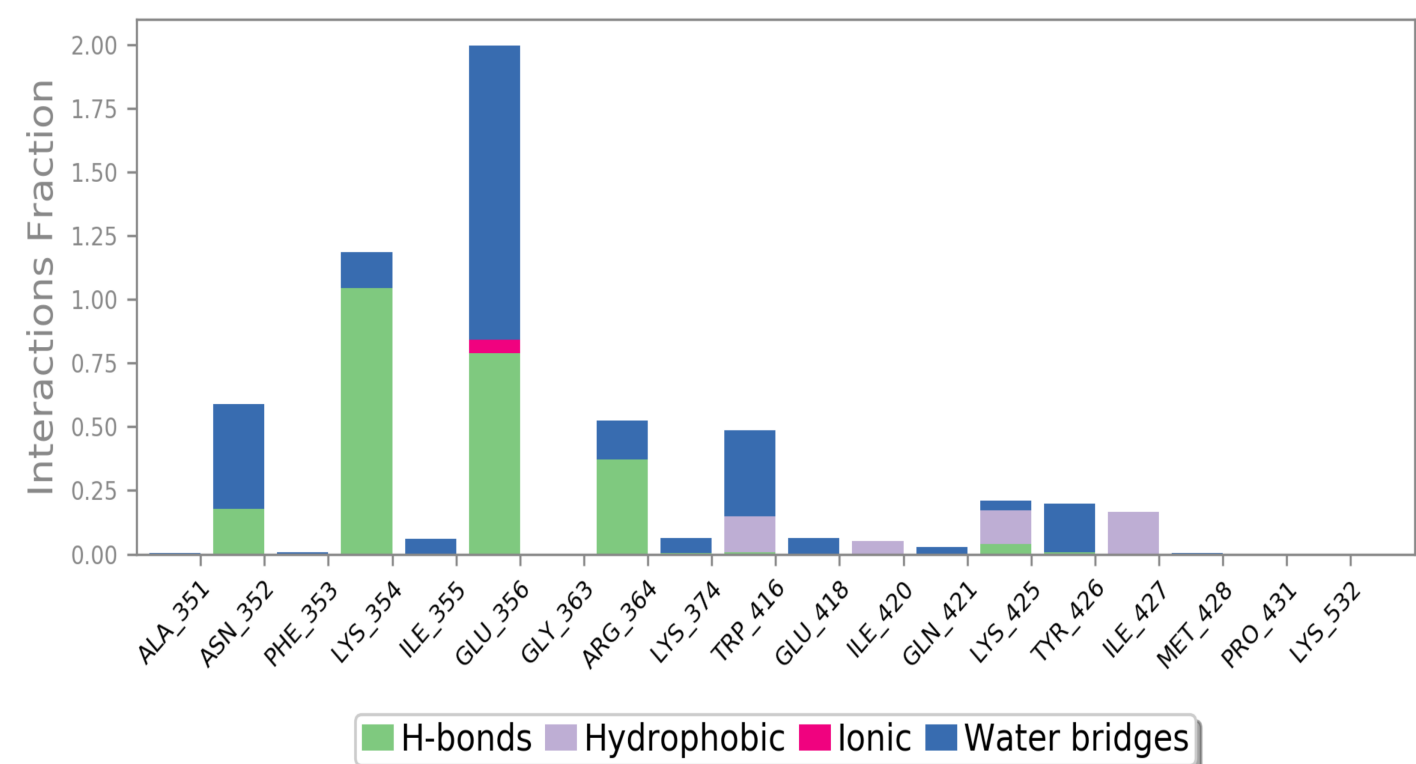

Figure S1. Protein-Daunorubicin contacts over time (100 ns).

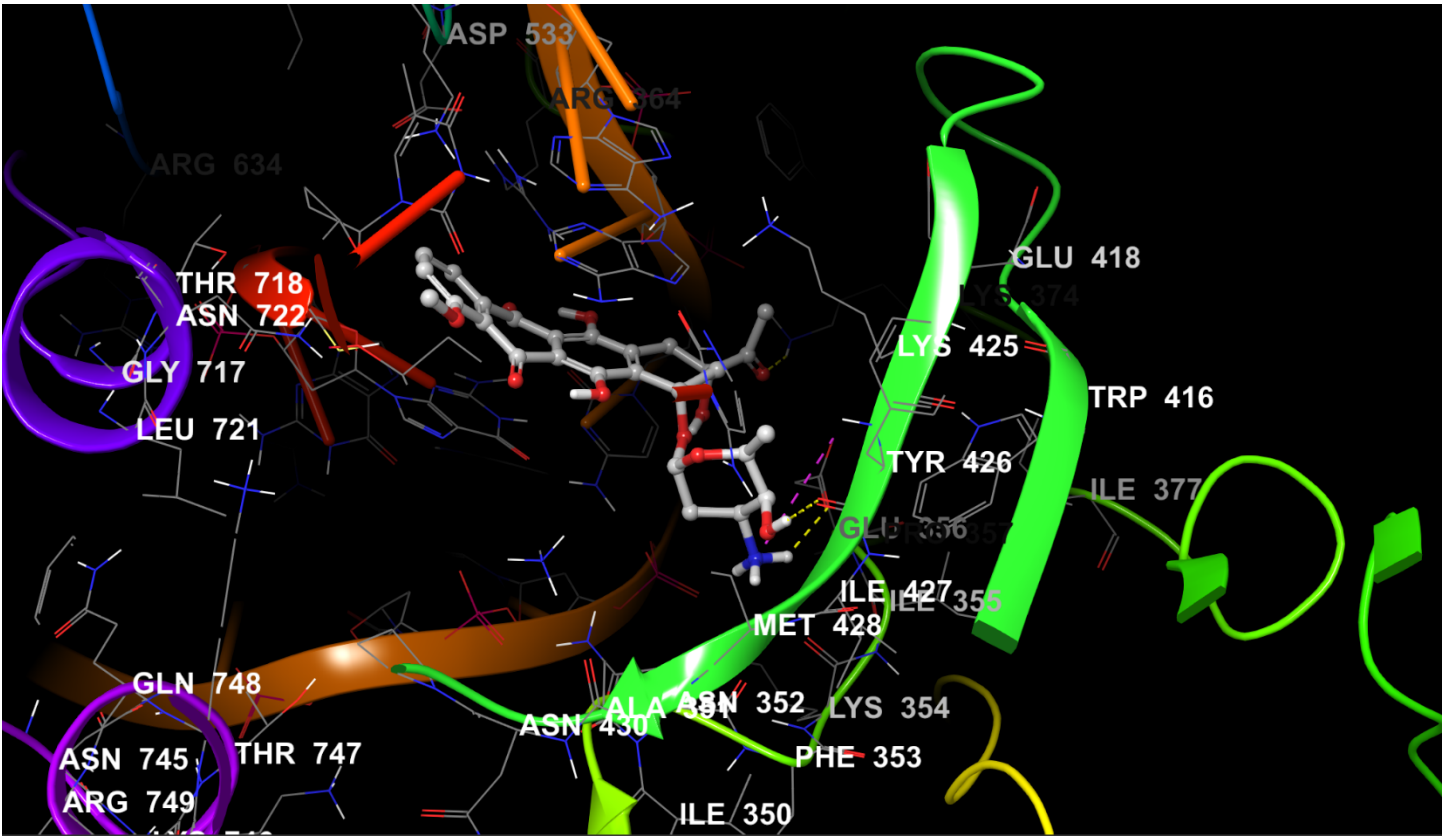

Figure S2. Daunorubicin first frame of molecular dynamics simulation (t =0 ns). Close-view capture. This view is the docking-output pose. The compound accommodates as and intercalating between the nitrogenated bases.

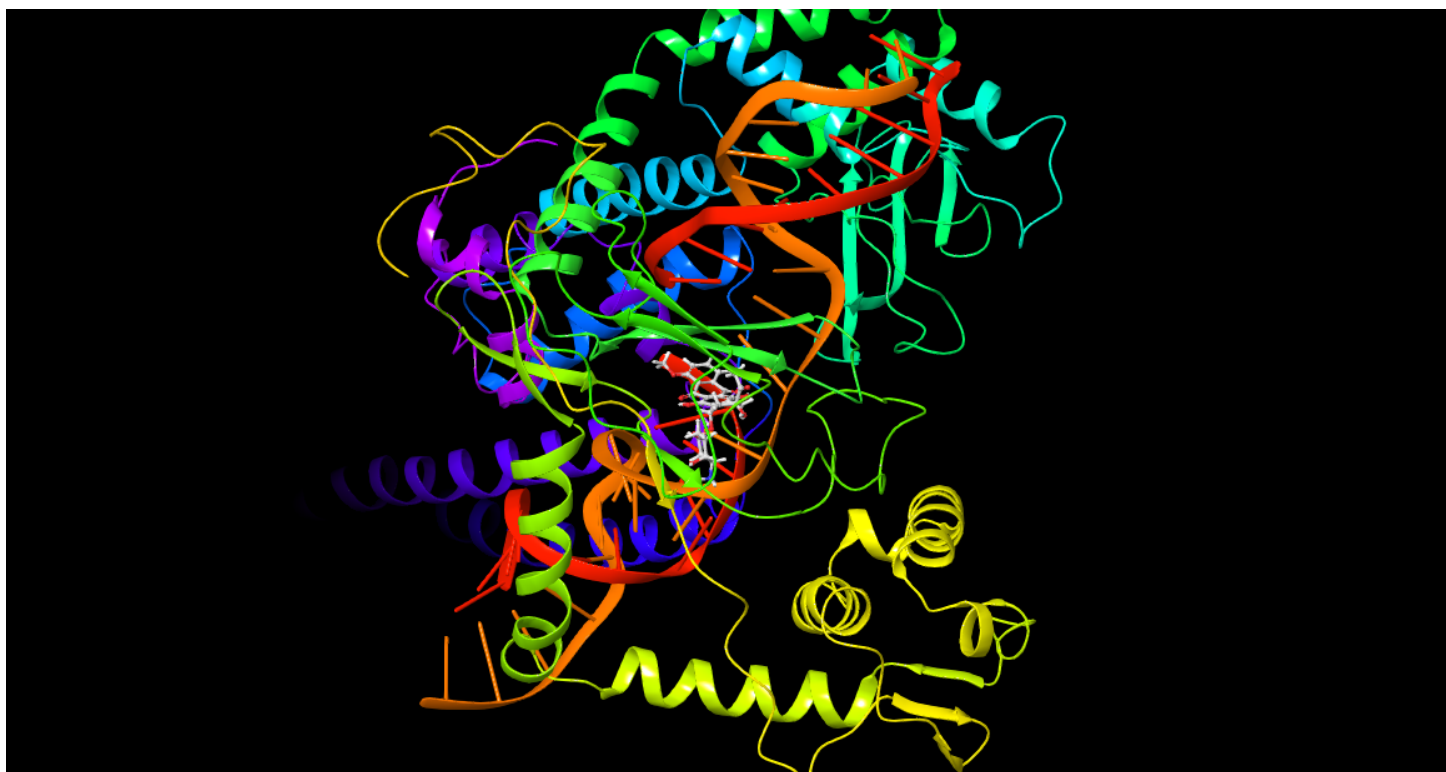

**Figure S3.** Daunorubicin last frame of molecular dynamics simulation (t = 100 ns). Far-view capture.

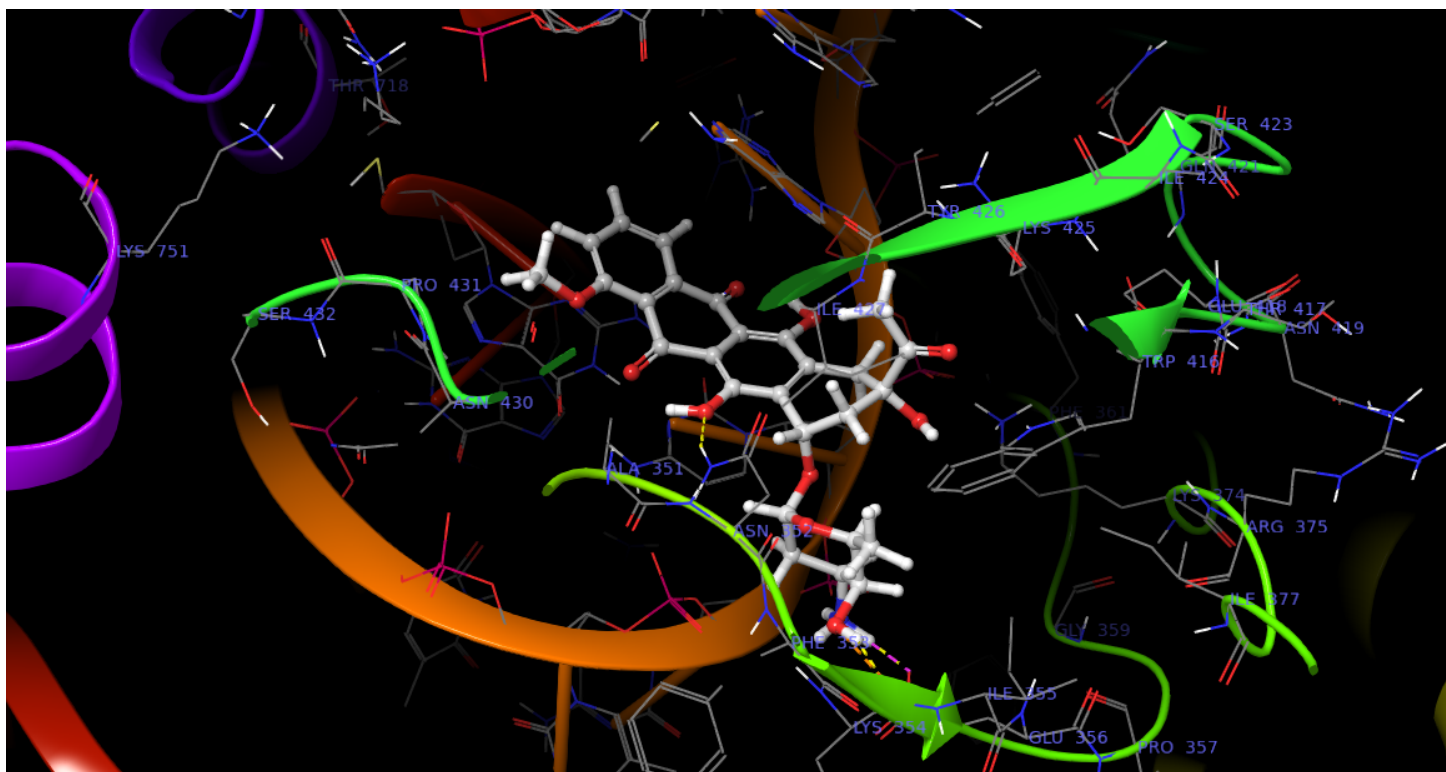

**Figure S4.** Daunorubicin last frame of molecular dynamics simulation (t= 100 ns). Close-view capture. The compound remains between the nitrogenated bases over time acting as an intercalating-drug.

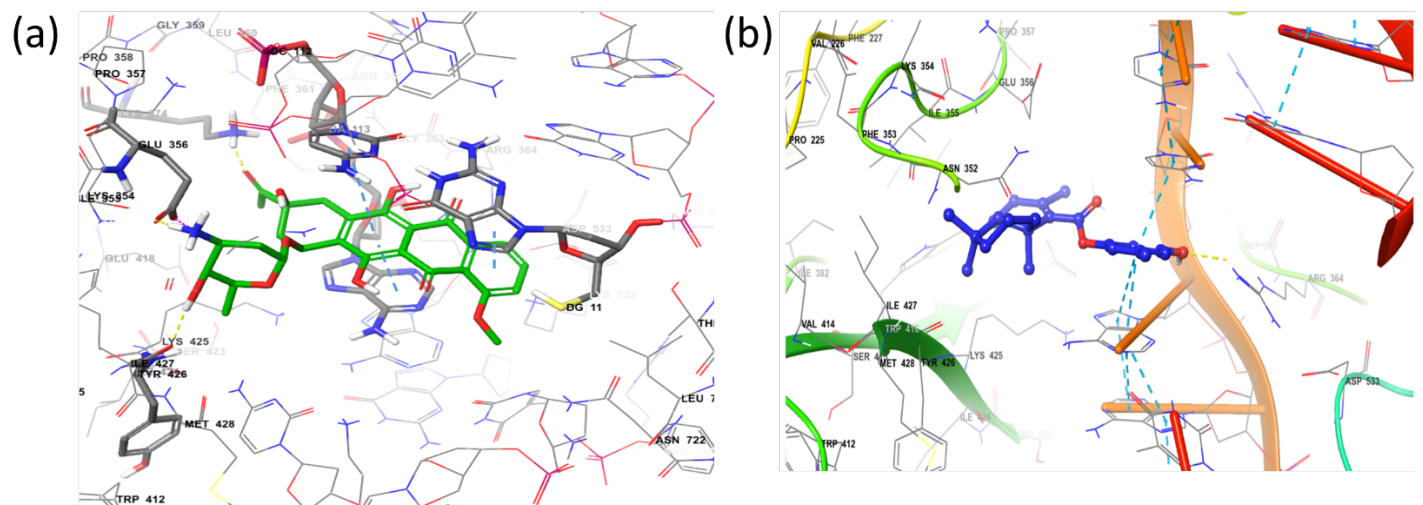

**Figure S5. a)** 3D pose obtained by docking for daunorubicin at the topotecan reference ligand site. Daunorubicin inserts as an intercalator between the DG11, DC112 and DA113 bases, establishing  $\pi$ -stacking interactions. **b)** 3D pose obtained by docking for compound **6a** at the topotecan reference ligand site. The benzene ring is oriented toward the DNA bases, while the drimanic fragment is oriented towards the enzyme.

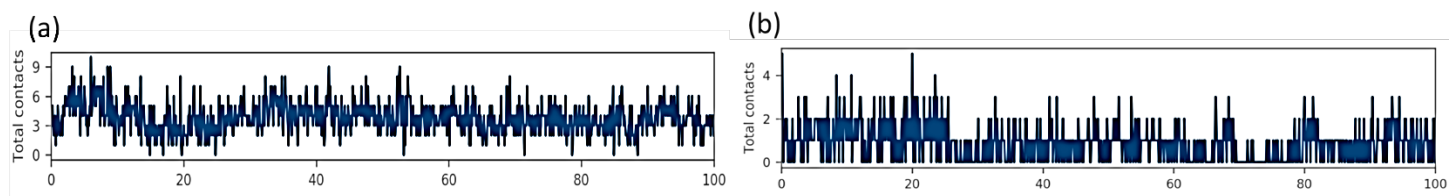

**Figure S6. (a, b)** Protein-ligand total contacts for daunorubicin, and compound **6a** respectively.
